# 1 Epithelial-mesenchymal plasticity induced by 2 discontinuous exposure to TGF $\beta$ 1 promotes tumour 3 growth

4 Mafalda Santos<sup>1,2,#</sup>, Marta Ferreira<sup>1,2,#</sup>, Patrícia Oliveira<sup>1,2</sup>, Nuno Mendes<sup>1,2</sup>, Ana André<sup>1,2</sup>, André  
5 F. Vieira<sup>1,2</sup>, Joana B. Nunes<sup>1,2</sup>, Joana Carvalho<sup>1,2</sup>, Sara Rocha<sup>1,2</sup>, Mafalda Azevedo<sup>2</sup>, Daniel  
6 Ferreira<sup>1,2,3</sup>, Inês Reis<sup>2</sup>, João Vinagre<sup>1,2</sup>, Joana Paredes<sup>1,2,5</sup>, Alireza Heravi-Moussavi<sup>4</sup>, Jorge Lima  
7 <sup>1,2,5</sup>, Valdemar Máximo<sup>1,2,5</sup>, Angela Burleigh<sup>4</sup>, Calvin Roskelley<sup>4</sup>, Maria de Fátima Carneiro<sup>1,2,5</sup>,  
8 David Huntsman<sup>4</sup>, Carla Oliveira<sup>1,2,5\*</sup>

9 1 I3S, Instituto de Investigação e Inovação em Saúde - Rua Alfredo Allen, 208, 4200-135 Porto, Portugal  
10 2 Ipatimup, Instituto de Patologia e Imunologia Molecular da Universidade do Porto- Rua Júlio Amaral de  
11 Carvalho, 45, Porto, Portugal  
12 3 INEB, Instituto de Engenharia Biomédica - Rua Alfredo Allen, 208, 4200-135 Porto, Portugal  
13 4 British Columbia Cancer Agency - 600 W 10th Avenue, Vancouver, BC V5Z 4E6, Canada  
14 5 Department of Pathology and Oncology of the Medicine Faculty of the University of Porto- Alameda  
15 Prof. Hernâni Monteiro, 4200 - 319 Porto, Portugal

16 # Co-authors

17 \* Correspondence: E-mail: [carlaol@ipatimup.pt](mailto:carlaol@ipatimup.pt); Expression regulation in Cancer Group, Lab 208S4 - i3S,  
18 Instituto de Investigação e Inovação em Saúde, Universidade do Porto, Rua Alfredo Allen, 208, 4200-135  
19 Porto, Portugal; [Tel.:+351220408800](tel:+351220408800); Fax: +351225570799.

20 **Short Title: EMT plasticity accelerates tumour growth**

21 **Simple Summary:** In this manuscript, we used a non-genetically manipulated EMT/MET cell line  
22 model to demonstrate that epithelial mesenchymal plasticity occurring in normal cells generates co-  
23 existing phenotypically and functionally divergent cell subpopulations which result in fast growing  
24 tumours *in vivo*.

25 **Keywords:** MET; Cellular Heterogeneity; Self-Renewal; EMT; tumorigenic potential

26 **Abstract:** Transitions between epithelial and mesenchymal cellular states (EMT/MET) contribute to  
27 cancer progression. We hypothesize that EMT followed by MET promotes cell population  
28 heterogeneity favouring tumour growth. We developed an EMT model by on/off exposure of  
29 epithelial EpH4 cells (E-cells) to TGF $\beta$ 1 that mimics phenotypic EMT (M-cells) and MET. We aimed  
30 at understanding whether phenotypic MET is accompanied by molecular and functional reversion  
31 back to epithelia, by using RNA sequencing, Immunofluorescence (IF), proliferation, wound  
32 healing, focus formation and mamosphere formation assays, as well as cell-xenografts in nude mice.  
33 Phenotypic reverted-epithelial cells (RE-cells), obtained after MET induction, presented pure  
34 epithelial morphology and proliferation rate resembling E-cells. However, RE transcriptomic profile  
35 and IF staining of epithelial and mesenchymal markers revealed a unique and heterogeneous  
36 mixture of cell-subpopulations, with high self-renewal ability fed by oxidative phosphorylation. RE-  
37 cells heterogeneity is stably maintained for long periods after TGF $\beta$ 1 removal, both *in vitro* and in  
38 large derived tumours in nude mice. Overall, we show that phenotypic reverted-epithelial cells (RE-  
39 cells) do not return to the molecular and functional epithelial state, present mesenchymal features  
40 related with aggressiveness and cellular heterogeneity that favour tumour growth *in vivo*. This work  
41 strengthens epithelial cells reprogramming and cellular heterogeneity fostered by inflammatory  
42 cues as a tumour-growth promoting factor *in vivo*.

## 43 **Introduction**

44 Epithelial to mesenchymal transition (EMT) and the reverse process, mesenchymal to epithelial  
45 transition (MET), are biological mechanisms naturally occurring during embryogenesis and  
46 regeneration [1, 2]. Although contradictory at first, the role of EMT and MET in cancer progression  
47 and metastization has now been fully acknowledged [2–6]. While EMT enables epithelial cancer cells  
48 dissemination, bestowing cells with increased invasion, migration and stem-cell properties, MET  
49 facilitates the establishment of these cells at secondary sites [3, 7, 8]. EMT and MET were previously  
50 seen as strict transition states where cells acquired specific phenotypes and molecular signatures.  
51 However, this biological programme is very dynamic and cannot be accurately defined by limited

52 sets of markers or phenotypic changes. Concomitant expression of epithelial and mesenchymal  
53 markers in cancer cells suggests occurrence of hybrid EMT states [1,8–10]. This cellular plasticity  
54 confers advantageous features to cancer cells conferring them with increased adaptability to  
55 microenvironment cues and resistance to several stressors [11]. Supporting this, Armstrong et al  
56 showed that >75% of circulating tumour cells (CTCs), isolated from patients with metastatic prostate  
57 and breast cancers, exhibited intermediate phenotype and stem-cell markers [12]. Moreover, Yu et al  
58 observed that CTCs from breast cancer patients, show a varying proportion of  
59 epithelial/mesenchymal markers associated with different breast cancer subtypes and treatment  
60 responses [13].

61 Many strategies have been described to induce EMT *in vitro*, such as artificially-induced  
62 overexpression of transcription factors, such as Snail and Twist1 [14–16] or treatment with growth  
63 factors/cytokines, such as TGF $\beta$ 1, EGF and NGF [1,17,18]. These *in vitro*, as well as *in vivo* studies  
64 have strengthened the hypothesis that EMT followed by MET occurs at different levels of cancer  
65 progression. Hugo et al showed that primary tumours derived from breast cancer cells, exhibited  
66 evidences of EMT at the invasive front, while derived metastasis expressed high levels of E-cadherin,  
67 suggesting MET [8]. Tsai et al showed that after activation of the EMT-inducer Twist1, cancer cells  
68 disseminated into the blood circulation, but Twist1 was inactivated to induce MET, allowing  
69 disseminated cancer cells to metastasize [19]. In line with this, Ocaña et al demonstrated that loss of  
70 the EMT-inducer Prrx1, together with the acquisition of an epithelial phenotype and stem-cell  
71 properties, were required for cancer cells to form metastases *in vivo*, reinforcing MET as an important  
72 event for cancer colonization [20].

73 The role of EMT and MET is currently well established in tumour progression and several reports  
74 also correlate EMT-drivers with increased stemness and prevalence of tumour-initiating cells (TICs)  
75 [21,22]. Current EMT/MET models always imply either the study of mammary stem cells and cancer  
76 stem cells separately or they promote cell transformation through activation of an oncogene, such as  
77 KRAS [22]. The EMT driver TGF $\beta$  was able to trigger increased breast TICs in claudin-low breast

78 cancer cell lines [23]. However, in a different study, it was suggested that TGF $\beta$  had an inhibitory  
79 role in breast TICs [24]. The molecular context in which these events occurred were not disclosed.

80 Herein, we hypothesize that EMT followed by MET promotes cell-population heterogeneity, and that  
81 this favours tumour growth. We characterized and explored an EMT/MET model and unveiled that  
82 MET generates population heterogeneity, which may drive tumour growth *in vivo*.

83

## 84 **Results**

### 85 *Phenotypic EMT/MET vs molecular EMT/MET*

86 To decipher the mechanisms underlying naturally-occurring MET, we established and  
87 characterized an *in vitro* EMT/MET model using the near-normal Eph4 mouse mammary epithelial  
88 cell line (E-cells) exposed to the EMT-inducer TGF $\beta$ 1 [25]. This non-cancer cell line was selected to  
89 prevent cancer-related bias. Moreover, this model has an homogenous nature both in terms of  
90 brightfield morphology and epithelial/mesenchymal markers expression [25]. After 7-day of TGF $\beta$ 1-  
91 treatment, E-cells acquired a fibroblastoid phenotype, resembling mesenchymal cells (M-cells, Fig  
92 1a). TGF $\beta$ 1 was then removed from the culture medium and after another 4 days, brightfield  
93 microscopy revealed widespread recovery of an epithelial phenotype (Reverted-Epithelial, RE-cells,  
94 Fig 1a, Supplementary Fig 1).

95 To confirm EMT-induction/reversion, E-, M- and RE-cells were characterized for expression of  
96 epithelial (*CDH1*, *Ocln*, *Mgat3*) and mesenchymal (*Vim*, *CDH2*, *Zeb2*, *Snai1*, *Twist1*) markers by qRT-  
97 PCR (Fig 1b). As we previously reported, we did not observe a significant alteration in *CDH1*  
98 expression, however the function of the corresponding protein E-cadherin was impaired, due to  
99 downregulation of *Mgat3* expression in M-cells, which is responsible for GnT-III-mediated  
100 glycosylation [25]. Moreover, M-cells displayed significant downregulation of other epithelial  
101 markers (*Ocln*) and upregulation of mesenchymal markers (*Vim*, *Zeb2*). In RE-cells, the expression  
102 of *Ocln*, *Mgat3*, *Vim* returned to levels similar to those of E-cells. In contrast, *Zeb2* expression

103 remained elevated in RE-cells, while Snai1 and Twist1 exhibited no alterations across E-, M- and RE-  
104 cells (Fig 1b). Immunofluorescence staining of these E-, M- and RE-cells for Snail and MMP2  
105 mesenchymal markers showed the classical EMT pattern, since they are not expressed in E-cells and  
106 are expressed in M-cells, but remained unchanged in RE-cells as compared to M-cells, suggesting that  
107 RE-cells did not fully revert to the epithelial state (Fig 1c). Overall, the phenotypic changes, gene  
108 expression and immunofluorescence results support that the current EMT model mimics phenotypic  
109 EMT (M-cells) and MET, but also suggests that phenotypic MET may not be accompanied by  
110 molecular and functional reversion back to epithelia.

111

### 112 *Phenotypic MET is not supported by complete molecular reversion back to epithelia*

113 We next used whole transcriptome sequencing (RNAseq) to explore differences and similarities  
114 between E-, M- and RE-cells. A good correlation was observed between the expression pattern  
115 obtained through qRT-PCR and RNAseq for epithelial/mesenchymal markers (Supplementary Fig 2).  
116 This validation allowed the use of RNAseq data to assess the expression variation of other EMT-  
117 associated markers, that supported EMT and partial MET (Supplementary Fig 2). RNAseq data was  
118 also used to identify Differentially Expressed Genes (DEGs) across the transcriptomic landscapes of  
119 E- and M- and RE-cells, by comparing: 1) E- and M-cells; 2) M- and RE-cells and; 3) E- and RE-cells  
120 (fold-change>1.50 or <0.66,  $p < 1.00E-02$ , Supplementary Fig 3). These DEGs, were then submitted to  
121 double hierarchical clustering analysis (Fig 1d). Although, RE-cells signature was overall more  
122 closely related to E- than to M-cells, this cell state presents its own transcriptomic landscape. Indeed  
123 1288 genes expressed in RE-cells, significantly changed specifically in this cellular state, while  
124 remaining stable during EMT (both in E- and M-cells). Among the top-ranking biological pathways  
125 there were 'morphogenesis of a branching epithelium', 'regulation of epithelial cell migration', 'small  
126 GTPase mediated signal transduction', but also 'negative regulation of locomotion'. Both 'epithelial  
127 cell proliferation' and 'positive regulation of mesenchymal cell proliferation' were also part of highly  
128 significant biological pathway in RE-cells (Fig 1e). These data further support that MET generated

129 epithelial-looking cells, differ from their original epithelial counterpart at the molecular level, but  
130 also that they differ significantly from the M-state cells from which they arose (Fig 1d, e, f  
131 Supplementary Fig 4).

132 A deeper analysis of biological functions and pathways significantly-enriched across the  
133 experiment (Supplementary Fig 5), showed that “Cellular Growth and Proliferation”, “Migration”,  
134 “Metabolism”, “Stemness” and, “Cancer” were affected in these transitions. These observations  
135 further supported the molecular differences between E-, M- and RE-cells, highlighting that even  
136 though our *in vitro* model was developed using a near-normal cell line, a significant association with  
137 aggressiveness and cancer-related features was detected upon EMT/MET induction.

138

### 139 ***Phenotypic MET generates E-like, M-like and novel cellular subpopulations***

140 Given that RE-cells seem to be transcriptionally heterogeneous and have a set of quite specific  
141 molecular features, we next assessed *in situ*, the immuno-expression of the epithelial marker E-  
142 cadherin and the mesenchymal marker Fibronectin in E-, M- and RE-cells (Fig 2a). E-cells displayed  
143 homogenous E-cadherin membrane staining and lacked Fibronectin, while M-cells showed an  
144 irregular staining of membranous E-cadherin (described in [25]) and high expression of extracellular  
145 Fibronectin (Fig 2a). RE-cells revealed a far more complex expression pattern of these two markers  
146 that evidenced the existence of four distinct sub-populations (Ecad+/Fn+; Ecad+/Fn-; Ecad-/Fn+; Ecad-  
147 /Fn-), some of them previously absent from E- and M-cells (Fig 2a). The most striking of all RE-cell  
148 populations, were those lacking E-cadherin expression (Ecad-/Fn+; Ecad-/Fn-), which appeared  
149 exclusively in RE- cells, a molecular change that is generally associated with EMT. To better assess  
150 the extent of RE-cell’s phenotypic heterogeneity, full slides of stained RE-cells were scanned. Of  
151 notice, no field was homogeneous for any of the four RE-subpopulations previously described,  
152 reinforcing their spatial co-existence (Supplementary Fig 6). To understand whether this  
153 heterogeneity was temporary and part of the reversal process back to the E-state, RE-cells were  
154 cultured for longer periods without TGFβ1. After 10 days, the same four sub-populations were still

155 observed in RE-cell cultures (Fig 2b). We could confirm this was not a specificity of the EpH4 on/off  
156 model, as the same transdifferentiation protocol applied to the human immortalized normal breast  
157 epithelial cell line MCF10A cells, returned similar results. Brightfield images of MCF-10A E-, M- and  
158 RE-cells show that RE-cells are mixture of E-like and M-like cells (Fig 2c, upper panel). We could not  
159 optimize the Fibronectin staining in this cell line, so we chose Vimentin as a mesenchymal marker.  
160 Unlike EpH4 M-cells, MCF10A M-cells completely loose E-Cadherin expression (Fig 2c, bottom  
161 panel). On the other hand, MCF10-A cells behave similarly to EpH4 cells after TGF $\beta$  removal from  
162 the media, regarding heterogeneous E-Cadherin and Vimentin staining across the culture, confirming  
163 that upon TGF $\beta$  on/off exposure some cell populations do not fully revert to E-state.

164

165 *Cellular heterogeneity, generated after phenotypic MET in vitro, creates functional*  
166 *heterogeneity*

167 Given that RE-cells represent an heterogeneous cellular population which is stable for several  
168 days in culture, we explored RE-cells functional behaviour in comparison to E- and M-cells.  
169 Moreover, we wanted to test the hints of aggressiveness observed in the transcriptomics analysis,  
170 eventually triggered by these transitions. For that, we analysed cell proliferation, cell behaviour when  
171 growing into a wound, and growth pattern in a focus formation assay, as several related biological  
172 functions were found enriched in RE-cells in the transcriptomics analysis (Fig 3a; Supplementary Fig  
173 5). BrdU incorporation revealed that E- and RE-cells displayed a higher proliferation rate than M-  
174 cells, but only RE-cells were statistically different from M-cells (49%, 52% for E- and RE- *vs.* 34% for  
175 M-cells,  $p < 0.05$ , Fig 3b). In fact, when comparing RE-cells with either M- or E-cells for proliferation-  
176 related DEGs, M-cells present a larger number of downregulated proliferation-associated genes than  
177 E-cells when both are compared with RE-cells, likely explaining why only M-cells differ from RE-  
178 cells in *the vitro* experiment (Fig 3b; Supplementary Fig 5).

179 The wound-healing assays photographed and analysed at several timepoints showed that M-  
180 cells in the wound were mainly isolated, while a sheet of seemingly epithelial cells covered the wound

181 area in E-cells (Fig 3c). In RE-cells, we observed both isolated cells, resembling those seen in M-cells,  
182 as well as areas with high cellular density, resembling the epithelial sheets seen in E-cells. In  
183 summary, RE-cells proliferated similarly to E-cells and faster than M-cells, while displaying both  
184 isolated cells and epithelial sheets covering the wound, reminiscent from both E- and M-cells. (Fig  
185 3c).

186 To understand whether RE-cells acquired aggressive cancer-like features (Supplementary Fig 5),  
187 we next ran a focus formation assay. For this, E-, M- and RE-cells were cultured for 21-days and  
188 morphological differences were evaluated by brightfield microscopy (Fig 3d). E-cells generated few,  
189 small and spherical structures with defined edges, which, according to Gordon et al, could be  
190 considered dome-like structures resembling non-malignant mammary glands [26]. M-cells displayed  
191 a high number of foci, with large and irregular edges, but not dome-like structures, which is an  
192 indicator of increased aggressiveness. RE-cells displayed both E-like domes and M-like foci. Together  
193 with the previous data, this supports RE-cells as an entity with unique and heterogeneous  
194 phenotypes, retaining both E-like and M-like features in the population. These results supported the  
195 hypothesis that MET may confer a more aggressive phenotype to otherwise immortalized normal  
196 cells.

197

198 *Cellular heterogeneity, generated after phenotypic MET in vitro, is maintained in tumours*  
199 *growing in vivo*

200 Our RNAseq data suggests that RE-cells are enriched in deregulated cancer-related pathways  
201 when compared to their E- and M-counterparts (Supplementary Fig 5). Therefore, we performed an  
202 *in vivo* pilot study, where cells that underwent EMT and MET were inoculated in the mammary fat-  
203 pad of athymic nude mice. Of notice, EpH4 cells have been described as non-tumourigenic [27]. In a  
204 pilot study, one out of two (1/2) mice inoculated with E-cells developed a tumour (6 mm<sup>3</sup> at day 145)  
205 and 1/2 mice inoculated with M-cells developed another tumour (21 mm<sup>3</sup> at day 132) (Supplementary  
206 Fig 7a). Both mice inoculated with RE-cells developed larger tumours (121 and 63 mm<sup>3</sup> at day 145,



207 Supplementary Fig 4a). This pilot study prompted us to assess the tumourigenicity of E-, M- or RE-  
208 cells in a larger group of mice (n=5, Fig 4a). In this second study, all cell types inoculated formed  
209 tumours, although with significantly distinct volumes. By the end of the experiment, E-tumours were  
210 significantly smaller in size (<30 mm<sup>3</sup>) than M-tumours (32-343 mm<sup>3</sup>) and RE-tumours (5-304 mm<sup>3</sup>,  
211 Fig 4b, c) ( $p<0.05$ ). M- and RE-tumours were similar in size. All tumours were classified as malignant  
212 sarcomatoid carcinomas upon histopathological evaluation (Fig 4d). All tumours presented  
213 evidences of hyalinization, while only M- and RE-tumours displayed necrotic areas. M-tumours  
214 revealed signs of inflammation and local epidermis invasion while RE-tumours displayed increased  
215 cellular density (Fig 4d). The presence of mitotic nuclei and the different tumour volumes observed,  
216 led us to assess proliferation in E-, M- and RE-tumours by Ki67 immunostaining, however no  
217 significant differences were observed (Fig 4e, f, Supplementary Fig 7b-h).

218 The molecular differences of E-, M- and RE-tumours were assessed through  
219 immunohistochemistry against E-cadherin and  $\alpha$ -SMA. E-tumours expressed E-Cadherin but not  $\alpha$ -  
220 SMA, whereas M-tumours lost E-cadherin expression and presented  $\alpha$ -SMA staining. RE-tumours,  
221 however, expressed both markers, suggesting that the cellular heterogeneity created *in vitro* after  
222 MET, could be maintained after long periods *in vivo*.

223

224 ***RE-cells mimic M-cells in self-renewal capacity in vitro and fast growth of tumour transplants***  
225 ***in vivo***

226 Our *in vitro* RNAseq data also revealed that not only M- but also RE-cells were enriched in stem-  
227 cell related pathways, as compared to E-cells (Supplementary Fig 5, Fig 5a), in agreement with  
228 literature showing that EMT generates cells with increased stemness [18]. Therefore, we explored  
229 whether M- and RE-cells displayed increased self-renewal capacity *in vitro*, using a first-passage  
230 mammosphere assay to evaluate whether E-, M- and RE-cells were able to grow in anchorage-  
231 independent conditions. Both M- and RE-cells displayed an increased ability to form first-passage  
232 mammospheres in comparison to E-cells (Fig 5b). Notably, RE-cells were able to form first-passage

233 mammospheres with the same efficiency as M-cells (Fig 5b). In parallel, we tested the self-renewal  
234 ability of E-, M- and RE-tumours by syngeneic transplantation of small tumour fragments [28]. The  
235 histology of transplanted tumours mimicked that of the original tumours, however the growth rate  
236 of transplanted tumours was higher than the original counterparts (180 in the original experiment *vs*  
237 49-84 days after transplantation) (Fig 5c). In particular, both M- and RE-transplanted tumours  
238 displayed a growth rate higher than the E-transplanted tumour, likely due to increased self-renewal  
239 ability [29]. In particular, two re-implanted fragments of an RE-tumour started their exponential  
240 growth just 15 days post-inoculation, when the original tumour took 110 days to start growing (Fig  
241 5d, left panel). Immuno-staining of these tumours with E-cadherin  $\alpha$ -SMA, revealed similar  
242 expression patterns to that of the original tumours, further supporting that cellular heterogeneity is  
243 stable (Fig 5d, right panel).

244 Altogether, our results show that RE-cells exhibit a high first-passage mammosphere formation  
245 efficiency, which is consistent with the faster growth of tumour transplants *in vivo*.

246

#### 247 ***RE-cells promote oxidative-phosphorylation after the EMT-related glycolytic shift***

248 To assess whether the similarities in behaviour between M- and RE-cells were associated with  
249 equivalent metabolic profiles, we returned to the RNAseq data. Several metabolic pathways were  
250 significantly-enriched in the DEG dataset and there were clear differences between E-, M- and RE-  
251 cells (Supplementary Fig 5). As a validation, we measured protein expression levels of several key  
252 enzymes for glycolysis (HKII [30]), anaerobic respiration (LDH [31]), and oxidative phosphorylation  
253 (ND1, NDUFS3 [32]), as well as the rate of lactate production [14] (Fig 6). A significant decreased  
254 expression of ND1 and NDUFS3 in M-cells in comparison with E-cells, demonstrated a selective  
255 shutdown of the oxidative phosphorylation (OXPHOS) enzymes in EMT (Fig 6d,f). As consequence,  
256 pyruvate was diverted towards lactate production, which was demonstrated by an increase in the  
257 rate of lactate produced by M-cells (Fig 6e, f). The OXPHOS shutdown observed in M-cells was  
258 reverted in RE-cells (Fig 6d-f), however, RE-cells seem to be using lactate-derived pyruvate to feed

259 OXPHOS, unlike E-cells. This can be inferred by HKII downregulation comparing to E-cells (Fig 6b),  
260 and increased LDH expression (Fig 6c), also explaining the low ratio of lactate produced in RE-cells  
261 (Fig 6e). Altogether, our data show that M-cells displayed a glycolytic metabolism, while RE-cells  
262 were strongly committed to revert to OXPHOS, but using its own circuitry that is different from E-  
263 cells (Fig 6f). These results shed further light into why RE-cells grow faster than E-cells *in vivo*, since  
264 their main source of pyruvate to foster OXPHOS is lactate-derived, which is abundant in the tumoral  
265 microenvironment.

266

## 267 Discussion

268 In this study, we show that phenotypic reverted-epithelial cells (RE-cells) do not return to the  
269 epithelial state in molecular and functional terms, present mesenchymal features related with  
270 aggressiveness and cellular heterogeneity that favour tumour growth *in vivo*. We selected TGF $\beta$ 1 for  
271 EMT induction, as this is a naturally abundant cytokine in tissues, secreted by immune and other  
272 cells, which populate the tumour microenvironment [33]. Moreover, TGF $\beta$ 1  
273 supplementation/withdrawal more closely recapitulates EMT/MET occurrence under physiological  
274 conditions, than strategies involving genetic manipulation [34].

275 We characterized cells that underwent EMT and that presented a phenotypic reversion back to  
276 epithelia (RE-cells). RE-cells revealed a distinct transcriptomic profile although resembling E-cells in  
277 their cobblestone phenotype and proliferation rate (Supplementary Fig 8). RE-cells displayed mixed  
278 E- and M-phenotypic features, were highly heterogeneous *in vitro* with regard to immuno-expression  
279 of epithelial and mesenchymal markers, and retained this heterogeneity when growing into large  
280 tumours in nude mice. These results are supported by Schmidt et al [35], who suggested that cells  
281 undergoing MET may never return to their original epithelial state, gaining aggressive features, and  
282 a distinct gene expression profile.

283 EMT has been associated with increased presence of TICs, tumour progression and  
284 aggressiveness [22,36,37], and MET has mainly been associated with increased colonization capacity

285 [8]. So far, neither EMT nor MET have been shown to drive tumourigenesis and the link between  
286 EMT plasticity and tumour initiation is still poorly understood. Further, most EMT/MET studies rely  
287 on external transformation factors, such as TWIST or SLUG [22,27,38].

288 Strikingly, we could demonstrate that RE-cells, but not E-cells, could generate large tumours *in*  
289 *vivo*, which grew even larger and faster when transplanted into different animals. These experiments  
290 demonstrated that supplementation/withdrawal of a physiologically abundant cytokine was enough  
291 to rewire the molecular program of an apparently non-tumourigenic cell line, resulting in increased  
292 tumour growth *in vivo* [27]. So far, only one study reported that genetic manipulation of Fra-1 was  
293 able to induce EMT and transformation of Eph4 cells, dependent on TGF $\beta$  levels [27]. Our work goes  
294 beyond that observation, providing evidence that physiological EMT plasticity, without genetic  
295 manipulation, may indeed contribute to foster tumour growth.

296 Unlike the homogenous E or M-cells, RE-cells presented a heterogeneous expression pattern of  
297 epithelial and mesenchymal markers (Supplementary Fig 6). Together with our *in vivo* results, these  
298 findings recall other EMT-related studies. For example, the work by Tsuji *et al* showed that co-  
299 injection of EMT and non-EMT cells originated more aggressive tumours than those obtained by  
300 injections of each cell type independently [39]. Upon inoculation, RE-cells were already a mixture of  
301 EMT (M-like) and non-EMT (E-like and novel phenotypes) cells, which may, in light of Tsuji *et al*,  
302 contribute to the observed RE-tumours increased growth rate. Moreover, the originally homogeneous  
303 M-cells also gave rise to high volume M-tumours, similarly to RE-tumours. This suggests that M-cells  
304 underwent MET *in vivo*, as M-tumours grew deprived of a persistent TGF $\beta$ 1 stimulus, unlike M-cells  
305 grown *in vitro*. Altogether, and in line with Tsuji *et al*, it is plausible to hypothesize that the intrinsic  
306 heterogeneity of RE-cells, and the likely *in vivo* MET in M-tumours, might enable cellular cooperation  
307 among distinct subpopulations, promoting tumour growth. Furthermore, RE-cells showed increased  
308 self-renewal capacity when compared to E-cells, as shown by increased tumour growth rate upon re-  
309 implantation of tumour fragments and by the first-passage mammosphere forming efficiency (Fig 5).

310 Using this model, we demonstrated that after EMT/MET there is a visible phenotypic reversion  
311 back to epithelia, which is not accompanied by molecular and functional reversion, but rather  
312 produces a stable heterogeneous cell-population with increased tumorigenic potential. We believe  
313 that EMT is crucial to prime E-cells into a more plastic state, culminating, after stimulus removal, into  
314 the generation of these distinct subpopulations. Therefore, our model seems to recreate the  
315 phenotypic heterogeneity commonly observed in human cancers. A wide range of theories argue that  
316 such heterogeneity may arise from clonal evolution, cancer stem-cells, microenvironment cues and/or  
317 reversible changes in cancer cells [29,40]. Our work strongly suggests that heterogeneity may be  
318 triggered by on/off exposure to a microenvironment cue (i.e. TGF $\beta$ 1), bestowing cells with aggressive  
319 features. In cancer patients, this heterogeneity is likely maintained due to crosstalk between different  
320 cancer cell subpopulations, and/or between cancer and non-cancer cell types. Supporting these  
321 assumptions is, for example, the direct TGF $\beta$ -signalling occurring between platelets and cancer cells,  
322 inducing EMT and favouring metastization [41]; the turning on/off of demethylases by different  
323 melanoma cell clones, giving rise to a mixture of cells with different tumour growth efficiencies [42];  
324 or the co-existence of epithelial, mesenchymal and hybrid cancer cell states in lung adenocarcinoma  
325 providing these tumours with increased survival [37].

326 In conclusion, our model allowed us to demonstrate that EMT plasticity generates cells with an  
327 heterogeneous and unique phenotype, which results in increased stemness and ability to form large  
328 tumours *in vivo*, providing evidence that inflammatory cues can influence tumour growth kinetics  
329 through EMT/MET transdifferentiation.

## 330 **Materials and Methods**

### 331 **Cell culture**

332 EpH4 [43] provided by Dr. Angela Burleigh and Dr. Calvin Roskelley, cultured as in [25].  
333 MCF10A cell line was cultured in DMEM/F12 Glutamax<sup>TM</sup> medium, supplemented with horse serum  
334 (5%, Lonza), recombinant human insulin (5 ug/mL), penicillin-streptomycin (1%, Invitrogen),  
335 hydrocortisone (500 ng/mL, Sigma-Aldrich), cholera toxin (20 ng/mL, Sigma-Aldrich), and

336 recombinant human epidermal growth factor (20 ng/mL, Sigma-Aldrich). Cell authentication by  
337 Ipatimup's Cell Lines Bank, using Powerplex16 STR-amplification (Promega,USA). M-cells obtained  
338 as in [25], using Transforming Growth Factor- $\beta$ 1 (TGF $\beta$ 1, Sigma-Aldrich,USA). RE-cells obtained as  
339 in [25] (Supplementary Fig 1).

340

#### 341 **RNA extraction/quantification**

342 RNA extraction, cDNA conversion and quantitative-Real-Time-PCR (qRT-PCR) from E-, M-, RE-  
343 cells performed as in [25]. qRT-PCR assays used were TaqMan Gene Expression (ThermoFisher,USA)  
344 and PrimeTime-qPCR (IDT,USA): CDH1 (Mm00486909\_g1), Ocln (Mm.PT.47.16166845), Mgat3  
345 (Mm00483213\_m1), Zeb2 (Mm.PT.47.13169136), Vim (Mm01333430\_m1), CDH2  
346 (Mm.PT.45.14052292), Twist1 (Mm00492575\_m1), GAPDH (Mm99999915\_g1), 18S (Hs99999901\_s1).  
347 Data analysed by  $2(-\Delta\Delta CT)$  method [44] and compared using Mann-Whitney test [45].

348

#### 349 **Immunocytochemistry**

350 E-, M-, RE-cells were fixed with methanol (Merck,USA), blocked using 3%BSA-PBS-  
351 0,5%Tween20 (Sigma-Aldrich,USA) incubated with anti-Snail (1:50,Cell Signaling,USA), anti-MMP2  
352 (1:50,Calbiochem,USA) and anti-mouse Alexa 488 (1:500,ThermoFisher,USA). Coverslips mounted  
353 using Vectashield-DAPI-mounting-medium (Vector Laboratories,USA). Images taken with  
354 ZeissImager.Z1AxioCamMRm (Zeiss,Germany).

355

#### 356 **Whole Transcriptome Sequencing**

357 RNA for Whole Transcriptome Sequencing (RNAseq) isolated as in [25]. Genomic DNA  
358 removed using RNase-Free-DNase (Qiagen,Germany), and purified using RNEasy Mini Kit  
359 (Qiagen,Germany). RNA quality analysed using Agilent2100-Bioanalyzer (RIN>9.7). E-, M-, RE-cells  
360 sequenced using Illumina Genome Analyzer (n=2) as a service at BCCA. Unique-reads were mapped  
361 to NCBI-m37 mouse genome using Bowtie, TopHat2 and differentially-expressed genes (DEGs

362 detected using *edgeR* R package . Genes with  $\log_2\text{fold-change} > 1$  or  $< -1$  and corrected  $p < 1.00E-02$ , were  
363 considered DEGs (Supplementary Fig 3). Statistics performed using R. *ClusterProfiler* R package was  
364 used for assessment of significantly-enriched GO terms and pathways ( $padj < 5.00E-02$ ). The heatmap  
365 was performed using the *heatmap.2* function of the *gplots* R package. We used the euclidean method  
366 to compute the distance and the complete method to perform the hierarchical clustering.

367

### 368 **E-cadherin and Fibronectin co-immunocytochemistry**

369 E-, M-, RE-cells fixed with methanol (Merck,USA), blocked using 3%BSA-PBS-0,5%Tween20  
370 (Sigma-Aldrich,USA) and co-incubated with anti-E-cadherin (1:50,Cell Signaling,USA), anti-  
371 Fibronectin (1:50,Santa Cruz,USA) and anti-rabbit/anti-mouse Alexa 488/594  
372 (1:500,ThermoFisher,USA). Coverslips mounted using Vectashield-DAPI-mounting-medium (Vector  
373 Laboratories,USA). Images taken with ZeissImager.Z1AxioCamMRm (Zeiss,Germany).

374

### 375 **BrdU assay**

376 E-, M-, RE-cells were incubated with 1 $\mu$ l of BrdU solution (ThermoFisher,USA) for 90 minutes,  
377 washed with Phosphate-Buffered-Saline solution (PBS) and fixed using 4%-formaldehyde (Sigma-  
378 Aldrich,USA). Next, cells were treated with 2M-HCl (Merck,USA), washed with PBS-0,5%Tween20-  
379 0,05%BSA (Sigma-Aldrich,USA), and incubated with anti-BrdU antibody (1:10, ThermoFisher,USA)  
380 and anti-mouse Ig-FITC (1:100,ThermoFisher,USA). Coverslips were mounted using Vectashield-  
381 DAPI-mounting-medium (Vector Laboratories,USA). Images were taken with  
382 ZeissImager.Z1AxioCamMRm (Zeiss,Germany) and stained-nuclei counted. Statistics performed  
383 using Mann-Whitney test [45].

384

### 385 **Focus formation assay**

386 E-, M-, RE-cells plated in 100mm plates and grown for 21 days (TGF $\beta$ 1-supplemented for M-  
387 cells). Brightfield images were taken for phenotype comparison.



388

389 **Wound-healing Assay**

390 Wounds produced in confluent E-, M-, RE-cell cultures using a filter-tip. Brightfield images of  
391 several E-, M-, RE-cells wounds taken at distinct timepoints (maximum:12h).

392

393 ***In vivo* tumourigenesis assay, H&E staining and KI67 immunohistochemistry**

394 1x10<sup>6</sup>/2x10<sup>6</sup> E-, M- or RE-cells were inoculated in the mammary fat-pad of 5-6 weeks female  
395 NIH(S)II-nu/nu mice. Pilot study: 2 mice inoculated with E-, M- or RE-cells in the mammary fat-pad  
396 (total n=6). *In vivo* tumourigenicity assay: 5 mice with double E-/RE-cells inoculation and 5 mice with  
397 single M-cell inoculation (total n=15). Two mice excluded due to unrelated health issues. *In vivo*  
398 syngeneic transplantation assay: 1mm<sup>3</sup> sections of 1 E-, 1 M- and 3 RE-tumours transplanted into the  
399 mammary fat-pad of 5 mice. Tumours measured with callipers and volumes estimated using  
400  $(\text{Width} \times \text{Length}^2)/2$ . Experiments carried out in accordance with European Guidelines for the Care  
401 and Use of Laboratory Animals, Directive-2010/63/UE and National Regulation (Diário da República-  
402 1.<sup>a</sup> série-N.º151). All mice were humanely euthanized. All tumours were formalin-fixed, paraffin-  
403 embedded and stained for hematoxylin and eosin. Immunohistochemistry performed for Ki67 as in  
404 [46] (ThermoFisher,USA). Three representative fields of each tumour selected and Ki67-stained nuclei  
405 counted using D-sight software (A.Menarini Diagnostics, Italy). Sections of 2 E-tumours, 3 M-  
406 tumours and 6 RE-tumours conserved in RNA-later (ThermoFisher,USA) used for RNA extraction,  
407 cDNA conversion and qRT-PCR as in [25]. Statistics performed using Mann-Whitney test [45].

408

409 **First-passage mammosphere formation assay**

410 E-, M-, RE-cells were plated (750 cells/cm<sup>2</sup>) in 1.2%-polyhema-coated 6-wells (Sigma-  
411 Aldrich,USA). Mammosphere growth medium described in [47]. Mammospheres counted after 5  
412 days. Statistics performed using Mann-Whitney test [45].

413



414 **Western Blot**

415 E-, M-, RE-cells lysates were immunoblotted as in [46]. The antibodies used were: HexokinaseII  
416 (Abcam,UK); Lactate-Dehydrogenase (Santa-Cruz,USA); NADH dehydrogenase1 (Santa-Cruz,USA);  
417 NADH-dehydrogenase-ubiquinone-iron-sulfur-protein3 (Abcam,UK); actin (Santa-Cruz,USA).  
418 Membranes incubated with horseradish-peroxidase-linked secondary antibodies (GE-  
419 Healthcare,UK). Quantification performed using QuantityOne (BioRad,USA). Statistics performed  
420 using Mann-Whitney test [45].

421

422 **Glucose consumption and lactate production**

423 Glucose GOD-PAD method (Roche,Switzerland) and LO-POD (Spinreact,Spain) measured  
424 glucose and lactate in E-, M-, RE-cells conditioned-media. EpH4 culture-medium used for glucose  
425 standard curve. Results presented as: lactate produced/glucose consumed/per million of cells.  
426 Statistics performed using Mann-Whitney test [45].

427

428

429

430 *Fig Legends*

431 **Fig 1. RE-cells underwent MET and display a transcriptomic signature that partially**  
432 **resembled E-cells. (a)** Brightfield images of E-, M-, RE-cells. **(b)** RNA expression analysis of EMT-  
433 associated markers in E-, M-, RE-cells (qRT-PCR, \* for  $p < 5.00E-02$  for E- vs. M-cells, § for  $p < 5.00E-02$   
434 for E- vs. RE-cells, # for  $p < 5.00E-02$  for M- vs. RE-cells). **(c)** Immunofluorescence staining for Snail,  
435 MMP2 and DAPI as indicated. RE-cells show a strong staining for both Snail and MMP2, indicating  
436 that they retain M-features. **(d)** Heatmap of differentially-expressed genes assessed by RNAseq  
437 ( $0.6 > \text{fold-change} > 1.5$ ,  $p < 1.00E-02$ ). Z-scored values from -1 to 1 (red to green, from low to high

438 expression levels). (e) Significantly-enriched biological pathways derived from the 1288 differentially-  
439 expressed genes specific for RE-cells. (f) Volcano Plots highlighting the differentially expressed genes in  
440 all the comparisons among the different cell lines.

441 **Fig 2. RE-cells are a mixture of different cellular subpopulations.** (a) Immunofluorescence  
442 staining for E-cadherin (red) and Fibronectin (green) and DAPI (blue) of E-, M- and RE-cells.  
443 Immunofluorescence images highlighting RE-cells heterogeneity, according to the graph displaying  
444 E-Cadherin and Fibronectin intensities across slides (b) RE-cells retain their E-cadherin/Fibronectin  
445 staining heterogeneity even if reversion time is longer than 4 days. Immunofluorescence images for  
446 RE-cells grown for 7 day after TGF $\beta$ 1 removal from the culture medium. (c) **Upper panel:** Brightfield  
447 images of MCF10A E-, M- and RE-cells. **Bottom panel:** Immunofluorescence staining for E-cadherin  
448 (Green) and Vimentinn (red) of MCF10A E-, M- and RE-cells.

449 **Fig 3. RE-cells exhibit high proliferation rate, heterogeneous migration pattern and focus**  
450 **formation assay** (a) Biological processes deregulated across comparisons ( $p_{adj} < 0.05$ ) displaying that  
451 RE-cells have a unique biological identity different from both E- and M-cells (b) Cell proliferation  
452 analysis, in terms of percentage of BrdU stained nuclei (per total number of DAPI-stained nuclei,  
453  $n=3$ ,  $*p < 0.05$  for MvsRE comparison). Volcano Plots showing upregulation of proliferation-related  
454 genes in RE-cells when compared to M- and E- cells.. (c) RE-cells exhibit mixed cell migration  
455 patterns, resembling both E and M-cells. Wound-healing brightfield images of E-, M-, RE-cells taken  
456 at different timepoints (0, 7, 12 hours, 100x). (d) Brightfield images of E-, M- and RE-cells grown for  
457 21 days in plastic and normal culture medium. Top panel, general view of the 21-day-cultured E-,  
458 M- and RE-cells (40x). Middle panel, bottom layer of non-transformed cells surrounding dome-like  
459 structures or foci (200x). Bottom panel, top layer of dome-like structures or foci obtained after 21  
460 days of culture of E-, M- and RE-cells (200x).

461 **Fig 4. M and RE-cells display higher in vivo tumorigenicity than E-cells, without retaining**  
462 **the original in vitro RNA profile.** (a) Summary of the *in vivo* tumorigenicity assay performed with

463 E-, M- and RE-cells. **(b)** Growth curves representing the tumour volumes along time (E-tumours in  
464 green, M-tumours in orange and RE-tumours in blue). **(c)** Final tumour volumes obtained for each  
465 cell type (\* for  $p < 5.00E-02$ ). **(d)** Representative images of hematoxylin and eosin staining of E-, M-,  
466 and RE-tumours. Top and bottom images with different magnification. **(e)** Average percentage of  
467 cells positive for Ki67 staining in 3 E-, 3 M- and 3 RE-tumours. **(f)** Representative images of  
468 immunohistochemistry staining for Ki67. Top and bottom images with different magnification. **(g)**  
469 E-cadherin and  $\alpha$ -SMA immunohistochemistry staining of representative E-, M- and RE-tumours.

470 **Fig 5. RE-cells display increased stemness potential . (a)** Volcano plots of stemness-related  
471 DEGs. **(b)** E-, M-, RE-cells first-passage mammosphere formation efficiency (\* for  $p < 5.00E-02$ ). **(c)**  
472 Pilot *in vivo* syngeneic transplantation assay for E, M and RE-tumours. Comparison between the final  
473 tumour volumes for the original E-, M- and RE-tumours used (grey bars) and the corresponding  
474 tumours obtained after syngeneic transplantation (black bars) at the same time-point post-  
475 inoculation or transplantation. **(d) Left panel.** Growth curve of a RE-tumour in the first passage in  
476 mice (left) and after reinoculation of two tumour pieces (right). **Right panel.** E-cadherin and  $\alpha$ -SMA  
477 immunohistochemistry staining of representative RE-tumours re-implanted tumours.

478 **Fig 6. RE-cells display re-activation of oxidative-phosphorylation, after a glycolytic shift**  
479 **observed in M-cells. (a)** Representative images of western-blot analysis for: HexokinaseII (HKII);  
480 Lactate dehydrogenase (LDH); NADH dehydrogenase (ND1); NADH dehydrogenase-ubiquinone-  
481 iron-sulfur-protein3 (NDUFS3); Actin (loading-control). **(b)** HKII protein quantification (n=3). **(c)**  
482 LDH protein quantification (n=3). **(d)** ND1, NDUFS3 protein quantification (n=3, \* for  $p < 5.00E-02$ ).  
483 **(e)** Rate of lactate produced per glucose consumed per million cells. **(f)** Summary of the expression  
484 variation of metabolic enzymes and rate of lactate production for comparisons between E- and M-  
485 cells, M- and RE-cells and E- and RE-cells. Each comparison was represented using a scheme  
486 portraying aerobic respiration and the variations observed in panels **(b-e)**. Double arrow,  $p < 5.00E-$   
487  $02$ ; single arrow,  $0.6 > \text{fold-change} > 1.5$  and  $p < 5.00E-02$ .

488

489 **Acknowledgments:** We thank Dina Leitão, Regina Pinto, Guilherme Oliveira for assistance with the  
490 immunohistochemistry and Ki67-stained nuclei automatic counting. **MS:** Data curation; Formal analysis;  
491 Writing – original draft; Writing – review & editing.

492

493 **CRedit Author Statement:** **MS:** Data curation; Formal analysis; Writing – original draft; Writing – review &  
494 editing. **MF:** Data curation; Formal analysis; Investigation; Methodology. **PO:** Conceptualization; Investigation;  
495 Methodology; Formal analysis; Writing – original draft. **JC:** Conceptualization; Investigation; Methodology;  
496 Formal analysis; Writing – original draft. **SR:** Investigation; Methodology. **MA:** Investigation; Methodology. **AV:**  
497 Investigation; Methodology. **DF:** Investigation; Methodology. **AB:** Investigation; Methodology. **CR:**  
498 Investigation; Methodology. **JV:** Investigation; Methodology. **JN:** Investigation; Methodology. **AA:**  
499 Investigation; Methodology. **AMH:** Investigation; Methodology. **JL:** Conceptualization. **VM:** Conceptualization.  
500 **JP:** Conceptualization. **DH:** Conceptualization; Resources. **MFC:** Formal analysis. **CO:** Conceptualization;  
501 Resources; Project administration; Supervision; Validation; Funding acquisition; Writing – original draft;  
502 Writing – review & editing

503

504 **Funding:** This work was financed by: 1) FEDER - Fundo Europeu de Desenvolvimento Regional funds through  
505 the COMPETE 2020 - Operacional Programme for Competitiveness and Internationalisation (POCI), Portugal  
506 2020, and by Portuguese funds through FCT - Fundação para a Ciência e a Tecnologia/ Ministério da Ciência,  
507 Tecnologia e Inovação in the framework of the project "Institute for Research and Innovation in Health Sciences"  
508 (POCI-01-0145-FEDER-007274); 2) NORTE-07-0162-FEDER-000118 - Contributos para o reforço da capacidade  
509 do IPATIMUP enquanto actor do sistema regional de inovação" and NORTE-07-0162-FEDER-000067 - Reforço e  
510 consolidação da capacidade infraestrutural do IPATIMUP para o sistema regional de inovação", both supported  
511 by Programa Operacional Regional do Norte (ON.2 – O Novo Norte), through FEDER funds under the Quadro  
512 de Referência Estratégico Nacional (QREN); 3) NORTE-01-0145-FEDER-000029, supported by Norte Portugal  
513 Regional Programme (NORTE 2020), under the PORTUGAL 2020 Partnership Agreement, through the  
514 European Regional Development Fund (ERDF) - "Tumour secreted factors in EMT/non-EMT cells for invasion  
515 and metastization", Research Line 3 project; 4) FCT granted projects " Tackling cancer stem cells: a challenge and

516 an opportunity to advance in anti-cancer therapy (CANCELSTEM)"- POCI-01-0145-FEDER-016390; "3DChroMe:  
517 Solving the 3D Chromatin Structure Of CDH1 Locus To Identify Disease-Associated Mechanisms"- PTDC/BTM-  
518 TEC/30164/2017; "GenomePT :: National Laboratory for Genome Sequencing and Analysis"-POCI-01-0145-  
519 FEDER-022184; 5) FCT Fellowships: 2020.05763.BD to MF; SFRH/BPD/89764/2012 to PO; SFRH/BPD/86543/2012  
520 to JC; PD/BI/113971/2015 to SR; PD/BD/105976/2014 to DF; SFRH/BPD/90303/2012 to AFV; SFRH/BD/90124/2012  
521 to JBN; SFRH/BD/81940/2011 to JV; 6) Salary support to JP (POPH - QREN Type 4.2, European Social Fund and  
522 Portuguese Ministry of Science and Technology (MCTES), Contrato Programa no âmbito do Programa  
523 Investigador FCT) and to MS through PTDC/MED-ONC/28834/2017.

524 **Conflicts of Interest:** The authors declare no conflict of interest

## 525 **References**

- 526 1 Lee, J.M. *et al.* The epithelial-mesenchymal transition: New insights in signaling, development, and  
527 disease. , *Journal of Cell Biology.* (2006)
- 528 2 Thiery, J.P. *et al.* Epithelial-Mesenchymal Transitions in Development and Disease. , *Cell.* (2009)
- 529 3 Yang, J. and Weinberg, R.A. Epithelial-Mesenchymal Transition: At the Crossroads of Development and  
530 Tumor Metastasis. , *Developmental Cell.* (2008)
- 531 4 Nieto, M.A. Epithelial-Mesenchymal Transitions in development and disease: Old views and new  
532 perspectives. , *International Journal of Developmental Biology.* (2009)
- 533 5 Voulgari, A. and Pintzas, A. Epithelial-mesenchymal transition in cancer metastasis: Mechanisms,  
534 markers and strategies to overcome drug resistance in the clinic. , *Biochimica et Biophysica Acta - Reviews*  
535 *on Cancer.* (2009)
- 536 6 Yang, J. *et al.* (2020) Guidelines and definitions for research on epithelial–mesenchymal transition. *Nat.*  
537 *Rev. Mol. Cell Biol.* 21, 341–352
- 538 7 Thiery, J.-P. *et al.* (2010) La transition épithéliomésenchymateuse au cours du développement dans la

- 539           fibrose et dans la progression tumorale. *Bull. Cancer* 97, 1285–1295
- 540    8        Gunasinghe, N.P.A.D. *et al.* (2012) Mesenchymal-epithelial transition (MET) as a mechanism for  
541           metastatic colonisation in breast cancer. *Cancer Metastasis Rev.* DOI: 10.1007/s10555-012-9377-5
- 542    9        Richardson, F. *et al.* (2012) The evaluation of E-cadherin and vimentin as biomarkers of clinical outcomes  
543           among patients with non-small cell lung cancer treated with erlotinib as second- or third-line therapy.  
544           *Anticancer Res.*
- 545    10       Van Denderen, B.J.W. and Thompson, E.W. Cancer: The to and fro of tumour spread. , *Nature.* (2013)
- 546    11       Andriani, F. *et al.* (2016) Conversion to stem-cell state in response to microenvironmental cues is  
547           regulated by balance between epithelial and mesenchymal features in lung cancer cells. *Mol. Oncol.* DOI:  
548           10.1016/j.molonc.2015.10.002
- 549    12       Armstrong, A.J. *et al.* (2011) Circulating tumor cells from patients with advanced prostate and breast  
550           cancer display both epithelial and mesenchymal markers. *Mol. Cancer Res.* DOI: 10.1158/1541-7786.MCR-  
551           10-0490
- 552    13       Yu, M. *et al.* (2013) Circulating breast tumor cells exhibit dynamic changes in epithelial and mesenchymal  
553           composition. *Science* (80-. ). DOI: 10.1126/science.1228522
- 554    14       Fiaschi, T. *et al.* (2012) Reciprocal metabolic reprogramming through lactate shuttle coordinately  
555           influences tumor-stroma interplay. *Cancer Res.* DOI: 10.1158/0008-5472.CAN-12-1949
- 556    15       Luo, H. *et al.* Cancer-associated fibroblasts: A multifaceted driver of breast cancer progression. , *Cancer*  
557           *Letters.* (2015)
- 558    16       Kim, H.Y. *et al.* On the role of mechanics in driving mesenchymal-to-epithelial transitions. , *Seminars in*  
559           *Cell and Developmental Biology.* (2017)
- 560    17       Di Donato, M. *et al.* (2019) Nerve Growth Factor Induces Proliferation and Aggressiveness In Prostate

- 561 Cancer Cells. *Cancers (Basel)*. 11,
- 562 18 Mani, S.A. *et al.* (2008) The Epithelial-Mesenchymal Transition Generates Cells with Properties of Stem  
563 Cells. *Cell* DOI: 10.1016/j.cell.2008.03.027
- 564 19 Tsai, J.H. *et al.* (2012) Spatiotemporal Regulation of Epithelial-Mesenchymal Transition Is Essential for  
565 Squamous Cell Carcinoma Metastasis. *Cancer Cell* DOI: 10.1016/j.ccr.2012.09.022
- 566 20 Ocaña, O.H. *et al.* (2012) Metastatic Colonization Requires the Repression of Ocaña, O. H., Córcoles, R.,  
567 Fabra, Á., Moreno-Bueno, G., Acloque, H., Vega, S., Barrallo-Gimeno, A., Cano, A., & Nieto, M. A. (2012).  
568 Metastatic Colonization Requires the Repression of the Epithelial-Mesenchymal Transition. *Cancer Cell* DOI:  
569 10.1016/j.ccr.2012.10.012
- 570 21 Scheel, C. *et al.* (2011) Paracrine and Autocrine Signals Induce and Maintain Mesenchymal and Stem Cell  
571 States in the Breast. *Cell* 145, 926–940
- 572 22 Ye, X. *et al.* (2015) Distinct EMT programs control normal mammary stem cells and tumour-initiating  
573 cells. *Nature* 525, 256–260
- 574 23 Bruna, A. *et al.* (2012) TGF $\beta$  induces the formation of tumour-initiating cells in claudin-low breast cancer.  
575 *Nat. Commun.* 3, 1055
- 576 24 Massagué, J. (2008) TGF $\beta$  in Cancer. *Cell* 134, 215–230
- 577 25 Pinho, S.S. *et al.* (2012) Loss and recovery of Mgat3 and GnT-III mediated E-cadherin N-glycosylation is  
578 a mechanism involved in epithelial-Mesenchymal-Epithelial transitions. *PLoS One* DOI:  
579 10.1371/journal.pone.0033191
- 580 26 Gordon, K.E. *et al.* (2000) A novel cell culture model for studying differentiation and apoptosis in the  
581 mouse mammary gland. *Breast Cancer Res.* DOI: 10.1186/bcr57
- 582 27 Bakiri, L. *et al.* (2015) Fra-1/AP-1 induces EMT in mammary epithelial cells by modulating Zeb1/2 and

- 583 TGF $\beta$  expression. *Cell Death Differ.* 22, 336–350
- 584 28 Kim, I.S. and Baek, S.H. Mouse models for breast cancer metastasis. , *Biochemical and Biophysical Research*  
585 *Communications.* (2010)
- 586 29 O'Brien, C.A. *et al.* (2010) Cancer stem cells and self-renewal. *Clin. cancer Res. an Off. J. Am. Assoc.*  
587 *Cancer Res.* 16, 3113–3120
- 588 30 Wolf, A. *et al.* (2011) Hexokinase 2 is a key mediator of aerobic glycolysis and promotes tumor growth  
589 in human glioblastoma multiforme. *J. Exp. Med.* DOI: 10.1084/jem.20101470
- 590 31 Adeva, M. *et al.* Enzymes involved in l-lactate metabolism in humans. , *Mitochondrion.* (2013)
- 591 32 Akouchekian, M. *et al.* (2011) Analysis of mitochondrial ND1 gene in human colorectal cancer. *J. Res.*  
592 *Med. Sci.*
- 593 33 Martin, M. *et al.* (2016) Targeting microenvironment in cancer therapeutics. *Oncotarget* 7, 52575–52583
- 594 34 Ma, H.-Y. *et al.* (2016) Inflammatory microenvironment contributes to epithelial-mesenchymal transition  
595 in gastric cancer. *World J. Gastroenterol.* 22, 6619–6628
- 596 35 Schmidt, J.M. *et al.* (2015) Stem-cell-like properties and epithelial plasticity arise as stable traits after  
597 transient twist1 activation. *Cell Rep.* DOI: 10.1016/j.celrep.2014.12.032
- 598 36 Grosse-Wilde, A. *et al.* (2015) Stemness of the hybrid Epithelial/Mesenchymal State in Breast Cancer and  
599 Its Association with Poor Survival. *PLoS One* 10, e0126522
- 600 37 Schliekelman, M.J. *et al.* (2015) Molecular portraits of epithelial, mesenchymal, and hybrid States in lung  
601 adenocarcinoma and their relevance to survival. *Cancer Res.* 75, 1789–1800
- 602 38 Guo, W. *et al.* (2012) Slug and Sox9 Cooperatively Determine the Mammary Stem Cell State. *Cell* 148,  
603 1015–1028
- 604 39 Tsuji, T. *et al.* (2008) Epithelial-mesenchymal transition induced by growth suppressor p12 CDK2-AP1



605 promotes tumor cell local invasion but suppresses distant colony growth. *Cancer Res.* DOI: 10.1158/0008-  
606 5472.CAN-08-1444

607 40 Meacham, C.E. and Morrison, S.J. Tumour heterogeneity and cancer cell plasticity. , *Nature.* (2013)

608 41 Labelle, M. *et al.* (2011) Direct Signaling between Platelets and Cancer Cells Induces an Epithelial-  
609 Mesenchymal-Like Transition and Promotes Metastasis. *Cancer Cell* DOI: 10.1016/j.ccr.2011.09.009

610 42 Roesch, A. *et al.* (2010) A Temporarily Distinct Subpopulation of Slow-Cycling Melanoma Cells Is  
611 Required for Continuous Tumor Growth. *Cell* DOI: 10.1016/j.cell.2010.04.020

612 43 Montesano, R. *et al.* (1998) Isolation of EpH4 mammary epithelial cell subpopulations which differ in  
613 their morphogenetic properties. *Vitr. Cell. Dev. Biol. - Anim.* DOI: 10.1007/s11626-998-0080-3

614 44 Livak, K.J. and Schmittgen, T.D. (2001) Analysis of relative gene expression data using real-time  
615 quantitative PCR and the 2- $\Delta\Delta$ CT method. *Methods* DOI: 10.1006/meth.2001.1262

616 45 R Development Core Team, R. (2011) *R: A Language and Environment for Statistical Computing,*

617 46 Carvalho, J. *et al.* (2012) Lack of microRNA-101 causes E-cadherin functional deregulation through EZH2  
618 up-regulation in intestinal gastric cancer. *J. Pathol.* 228, 31–44

619 47 Grimshaw, M.J. *et al.* (2008) Mammosphere culture of metastatic breast cancer cells enriches for  
620 tumorigenic breast cancer cells. *Breast Cancer Res.* DOI: 10.1186/bcr2106  
621  
622

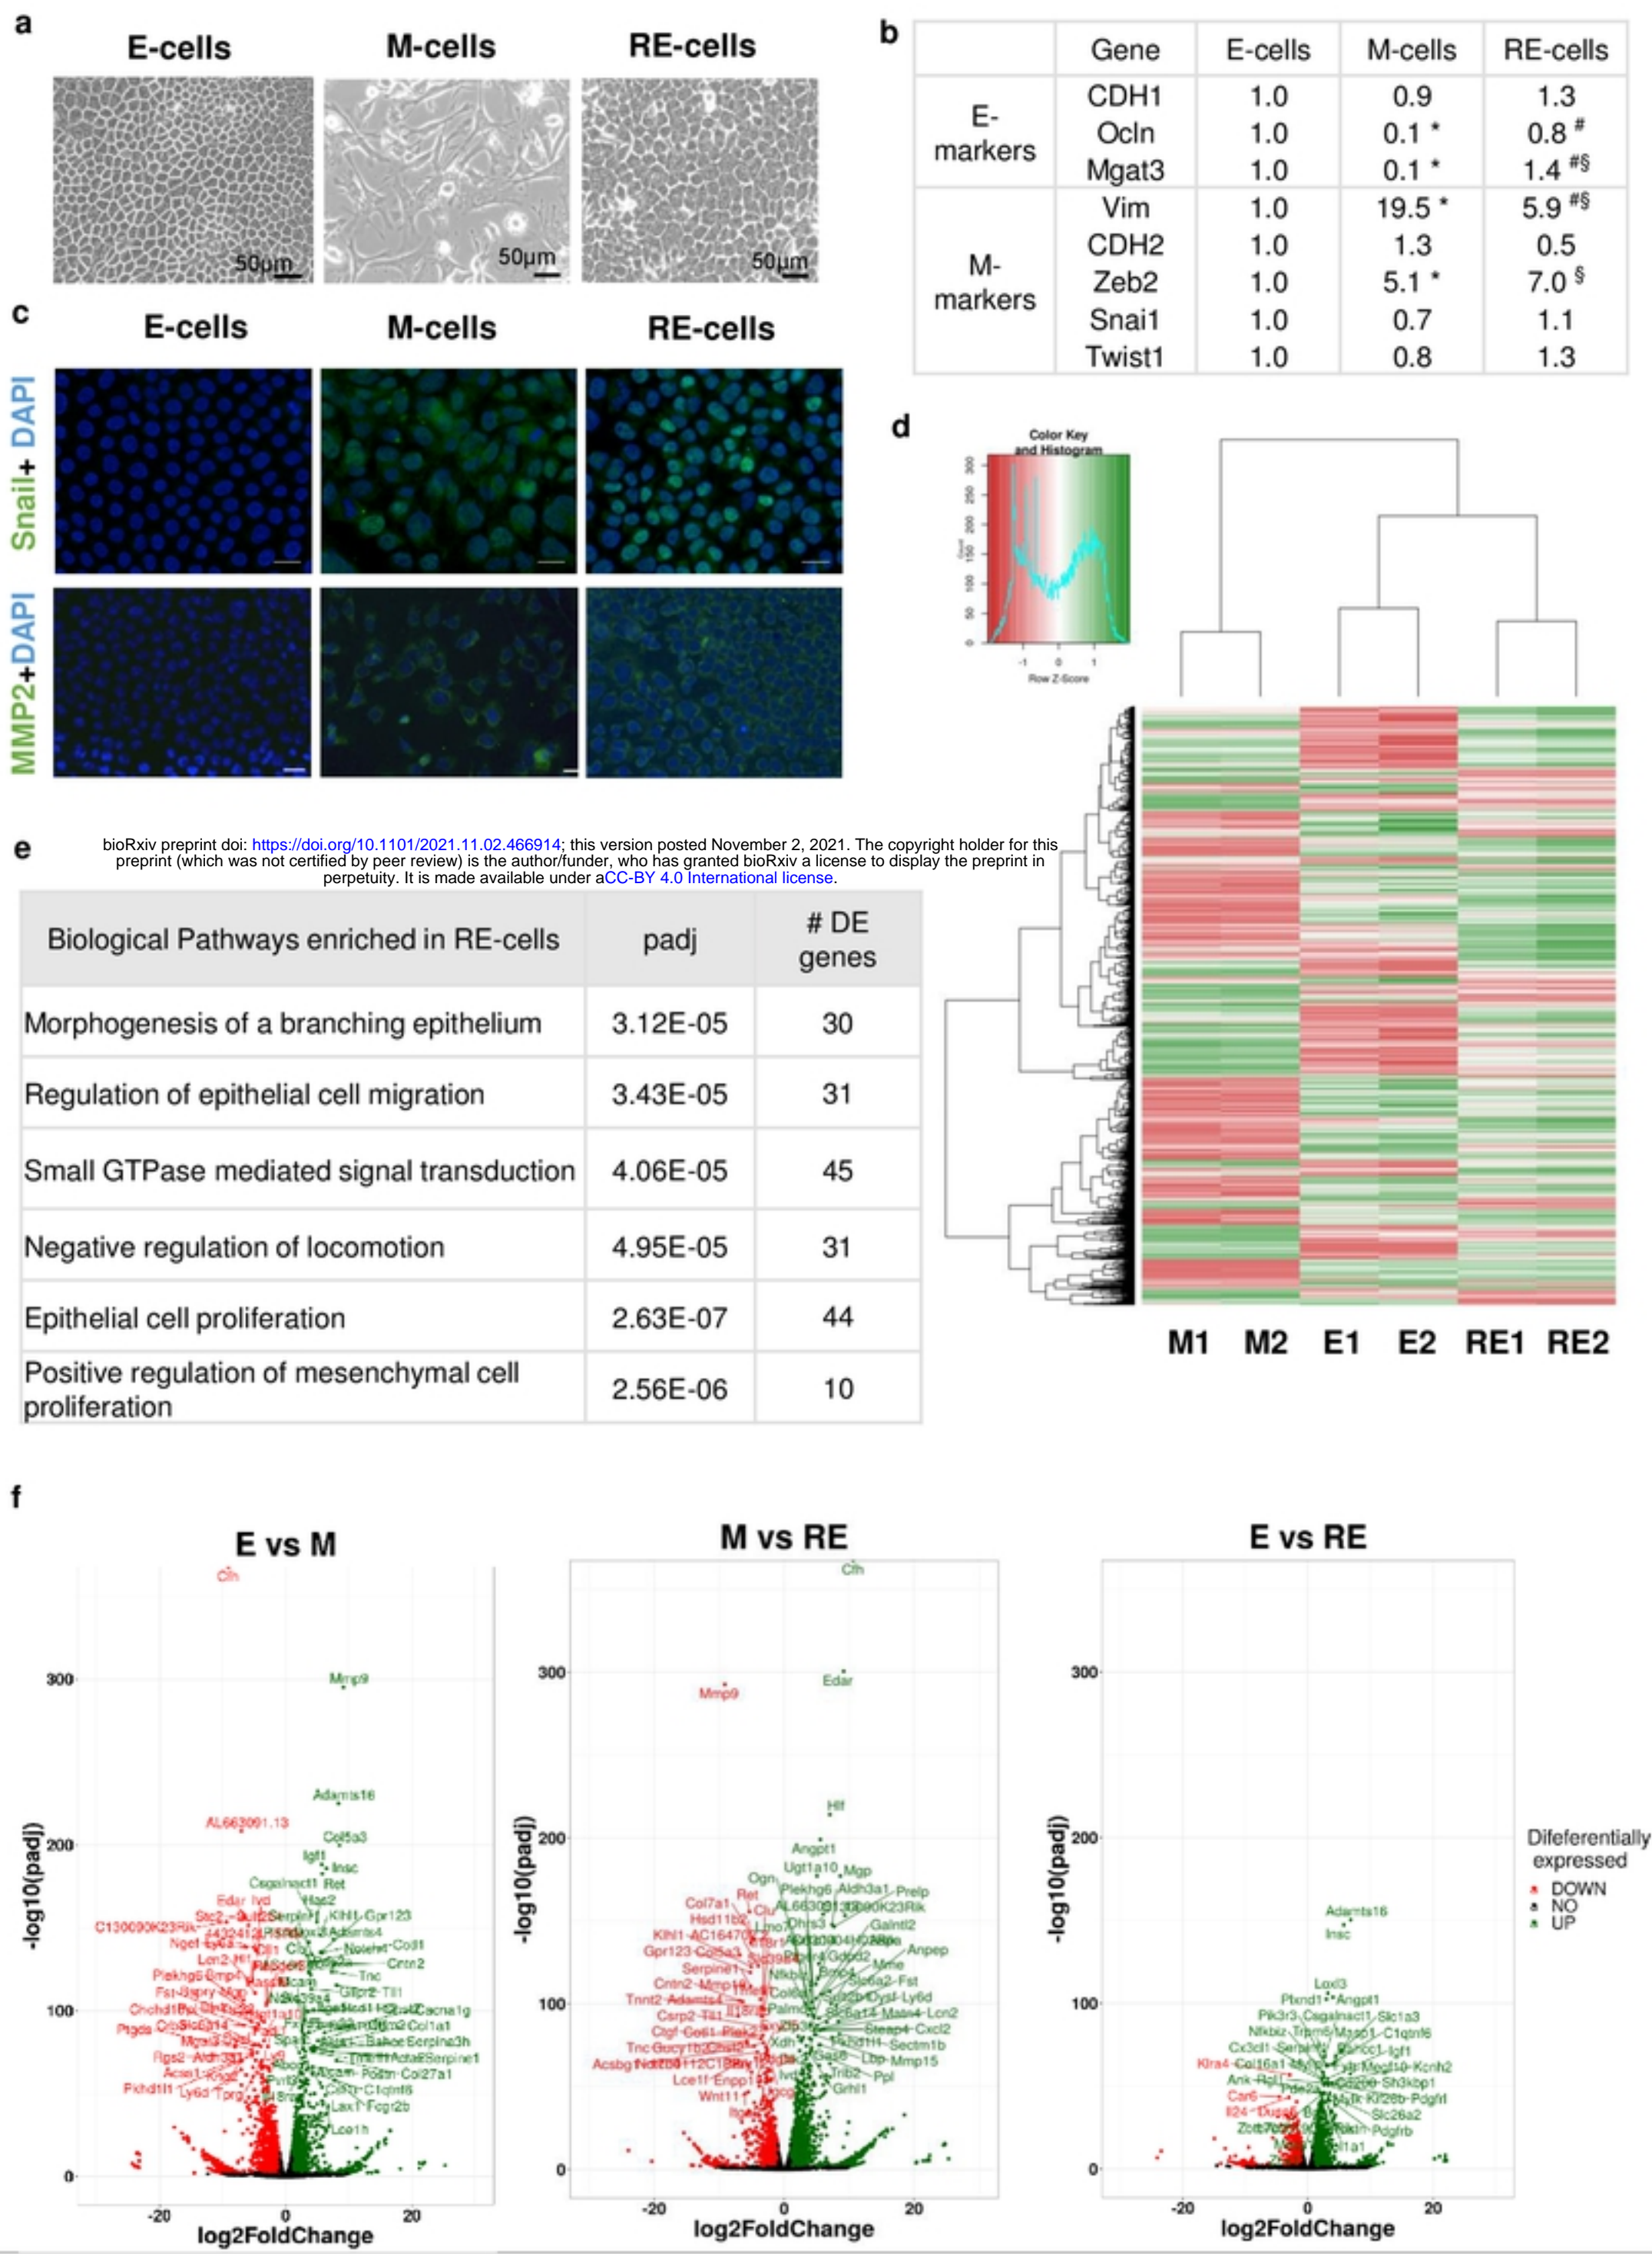

Figure 1



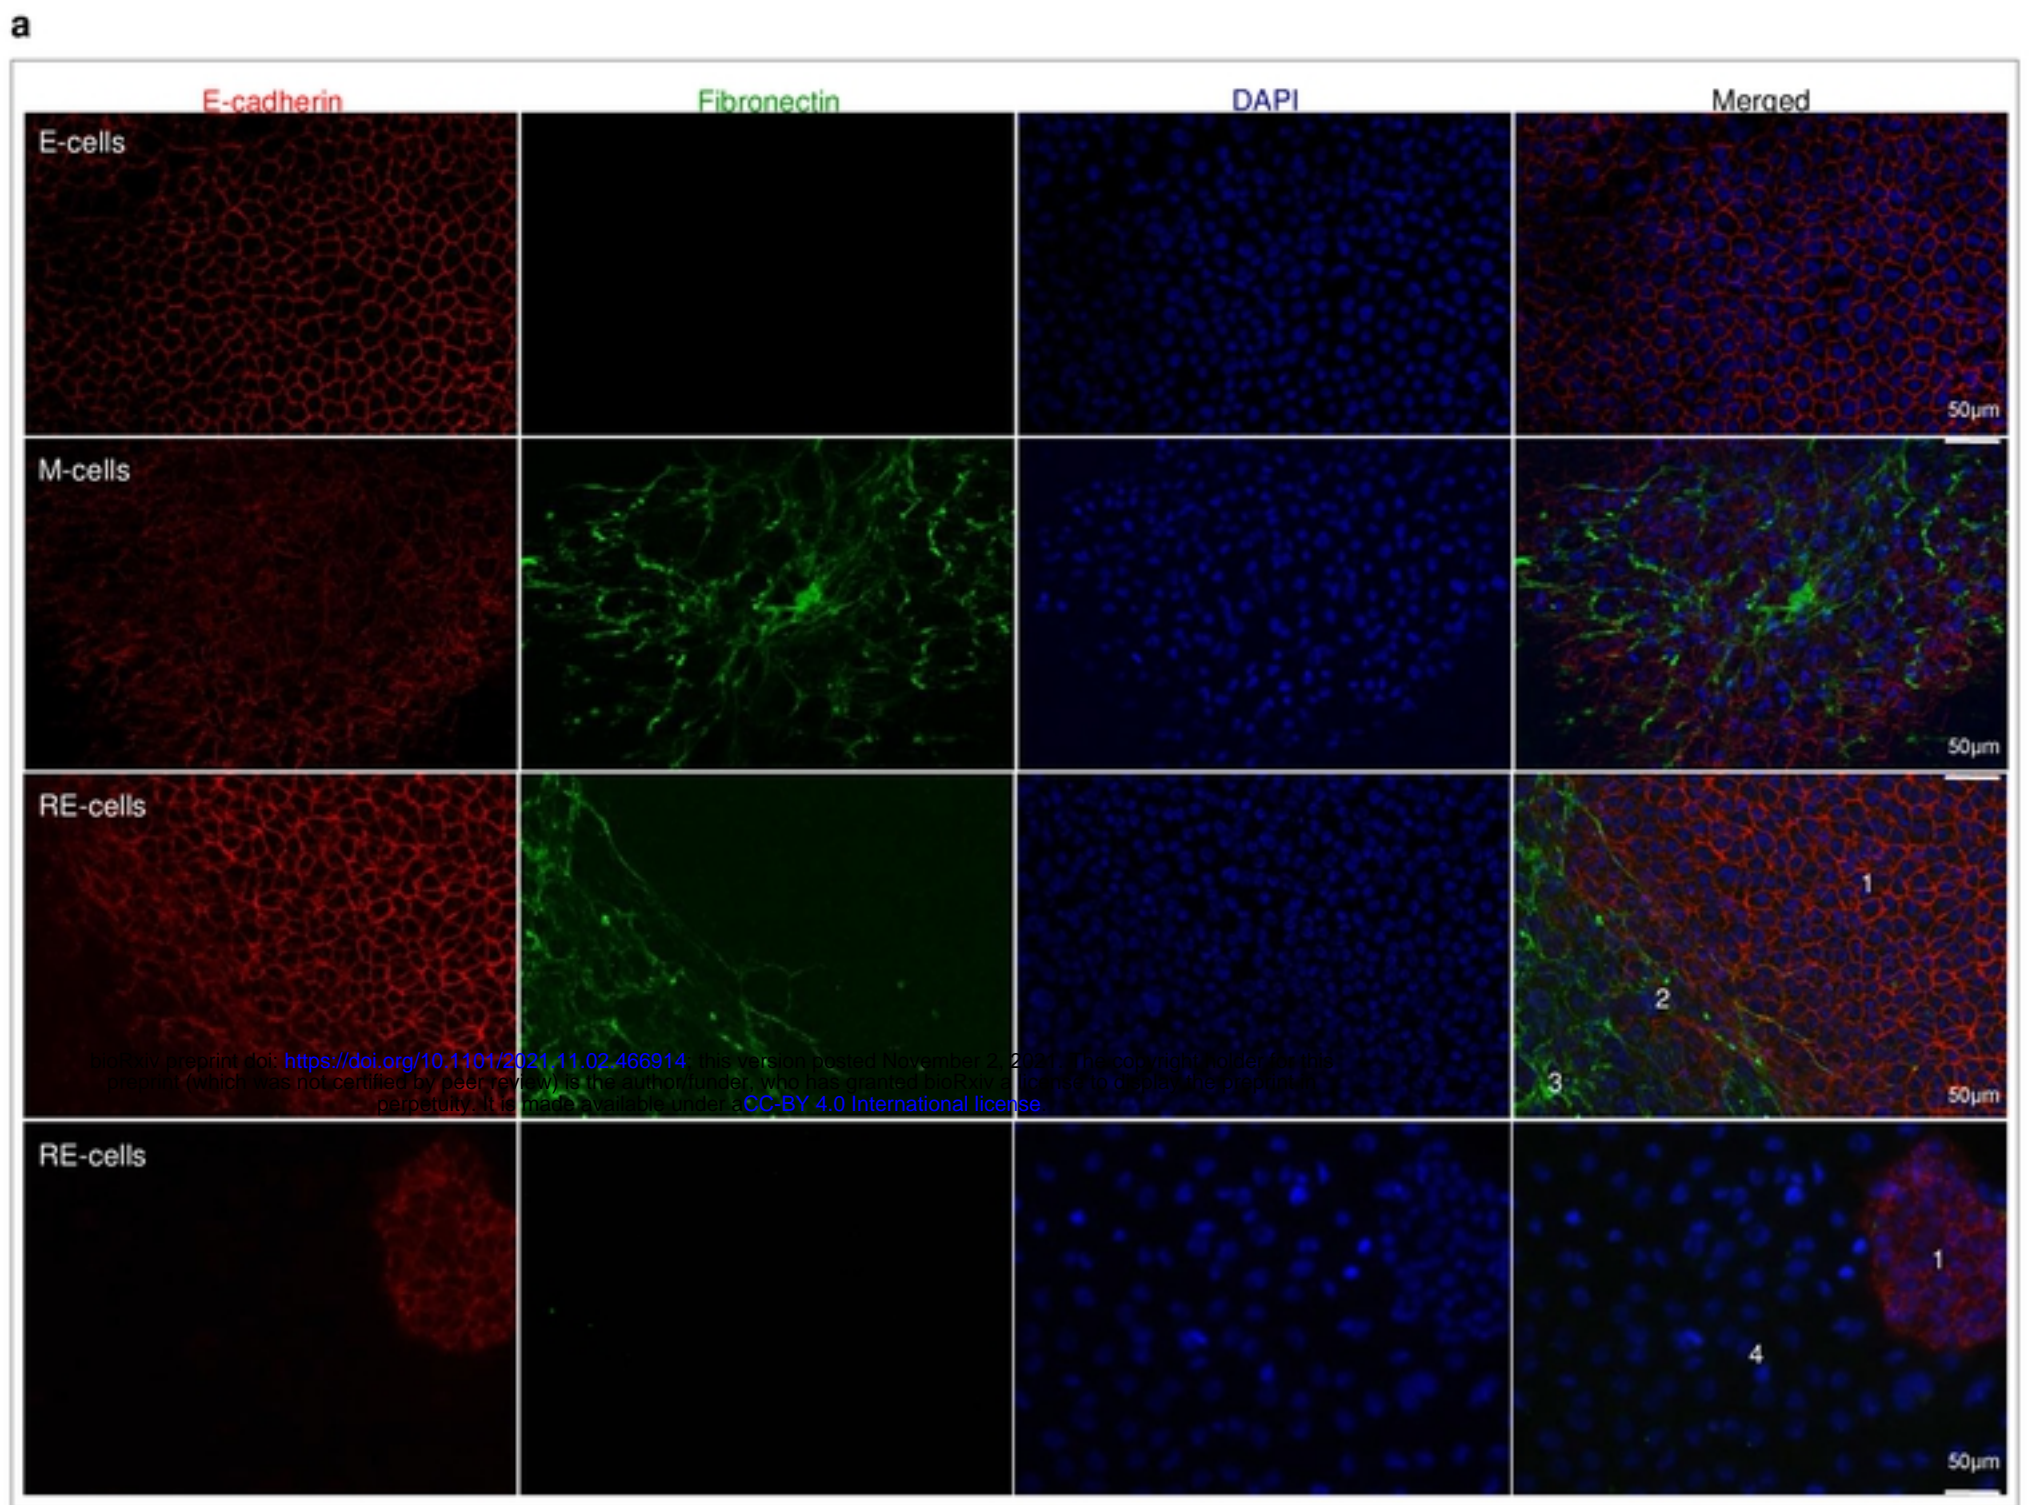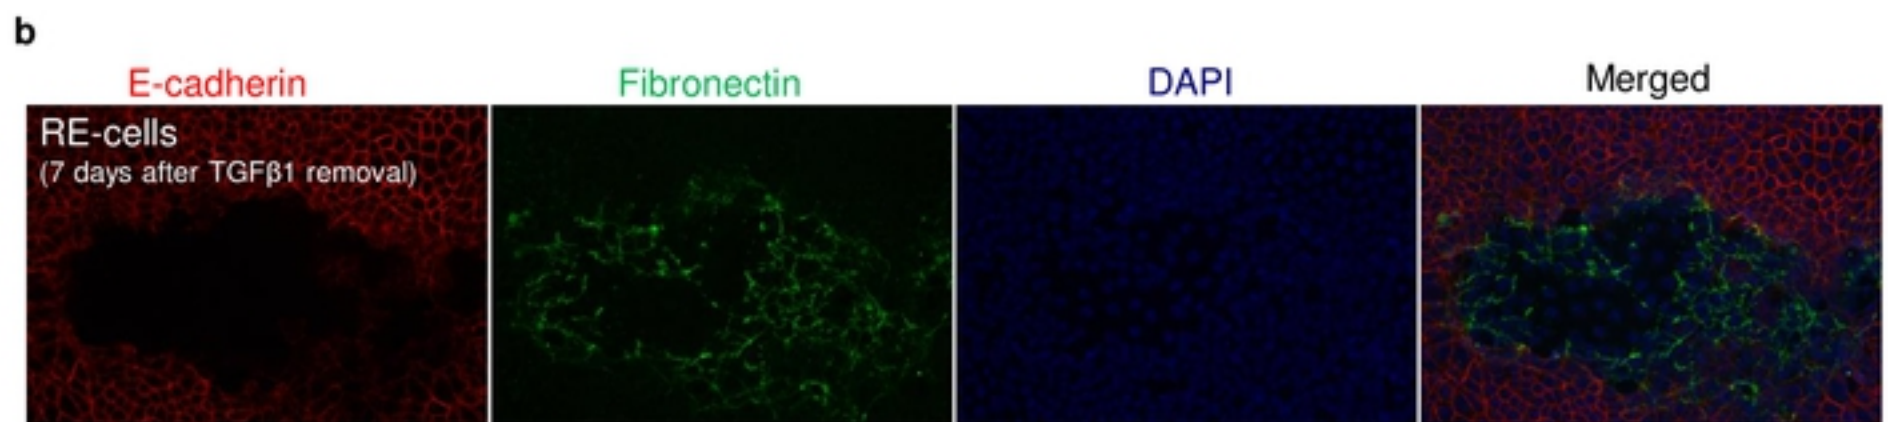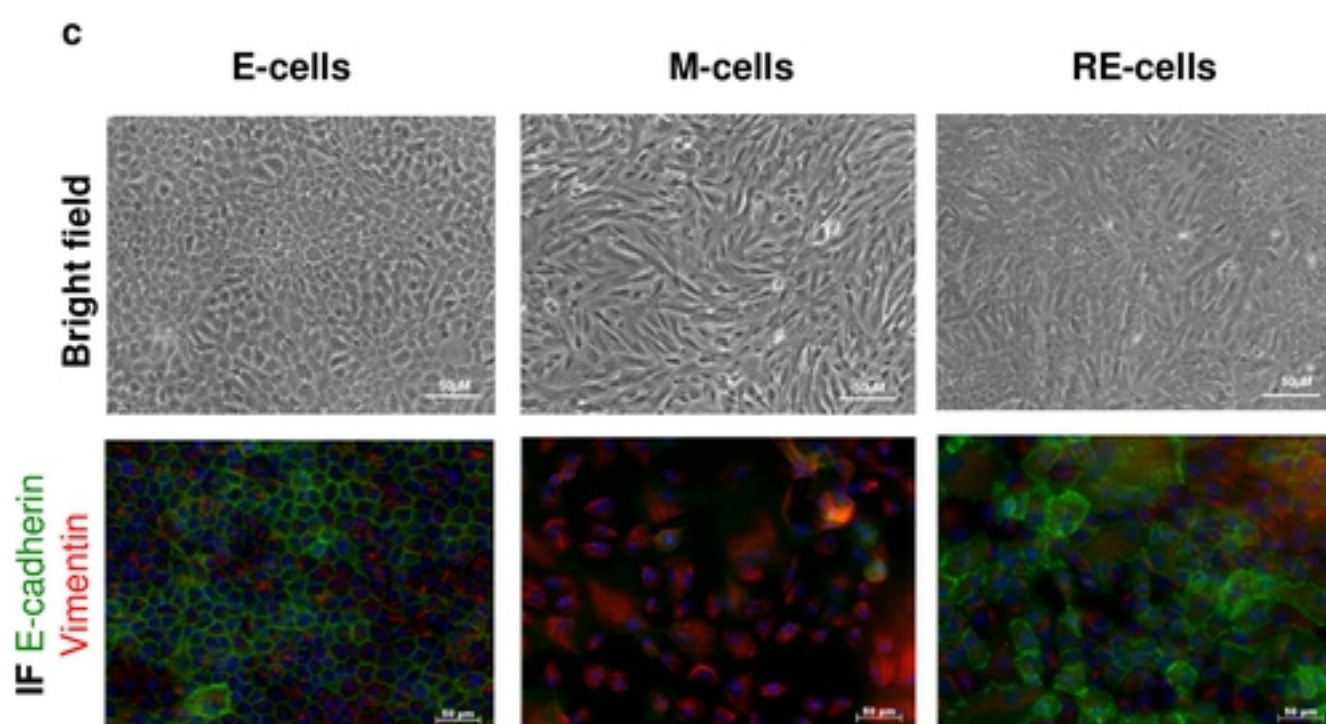

Figure2



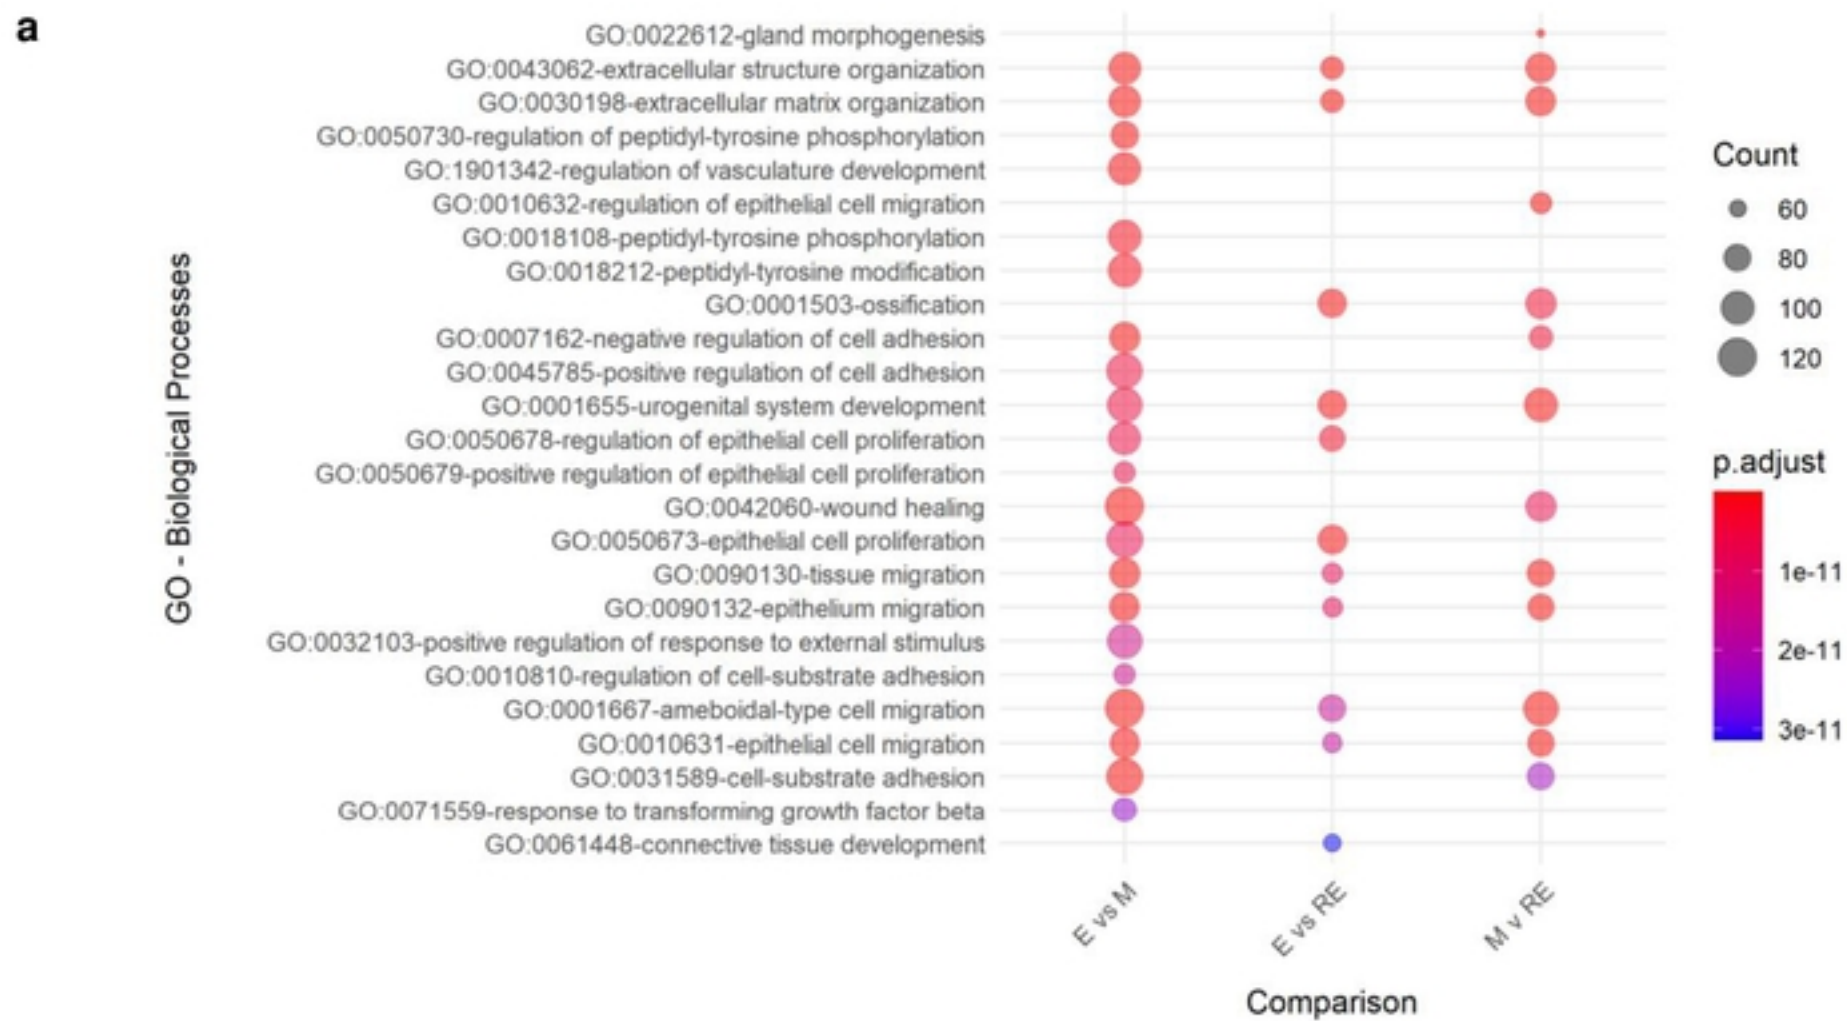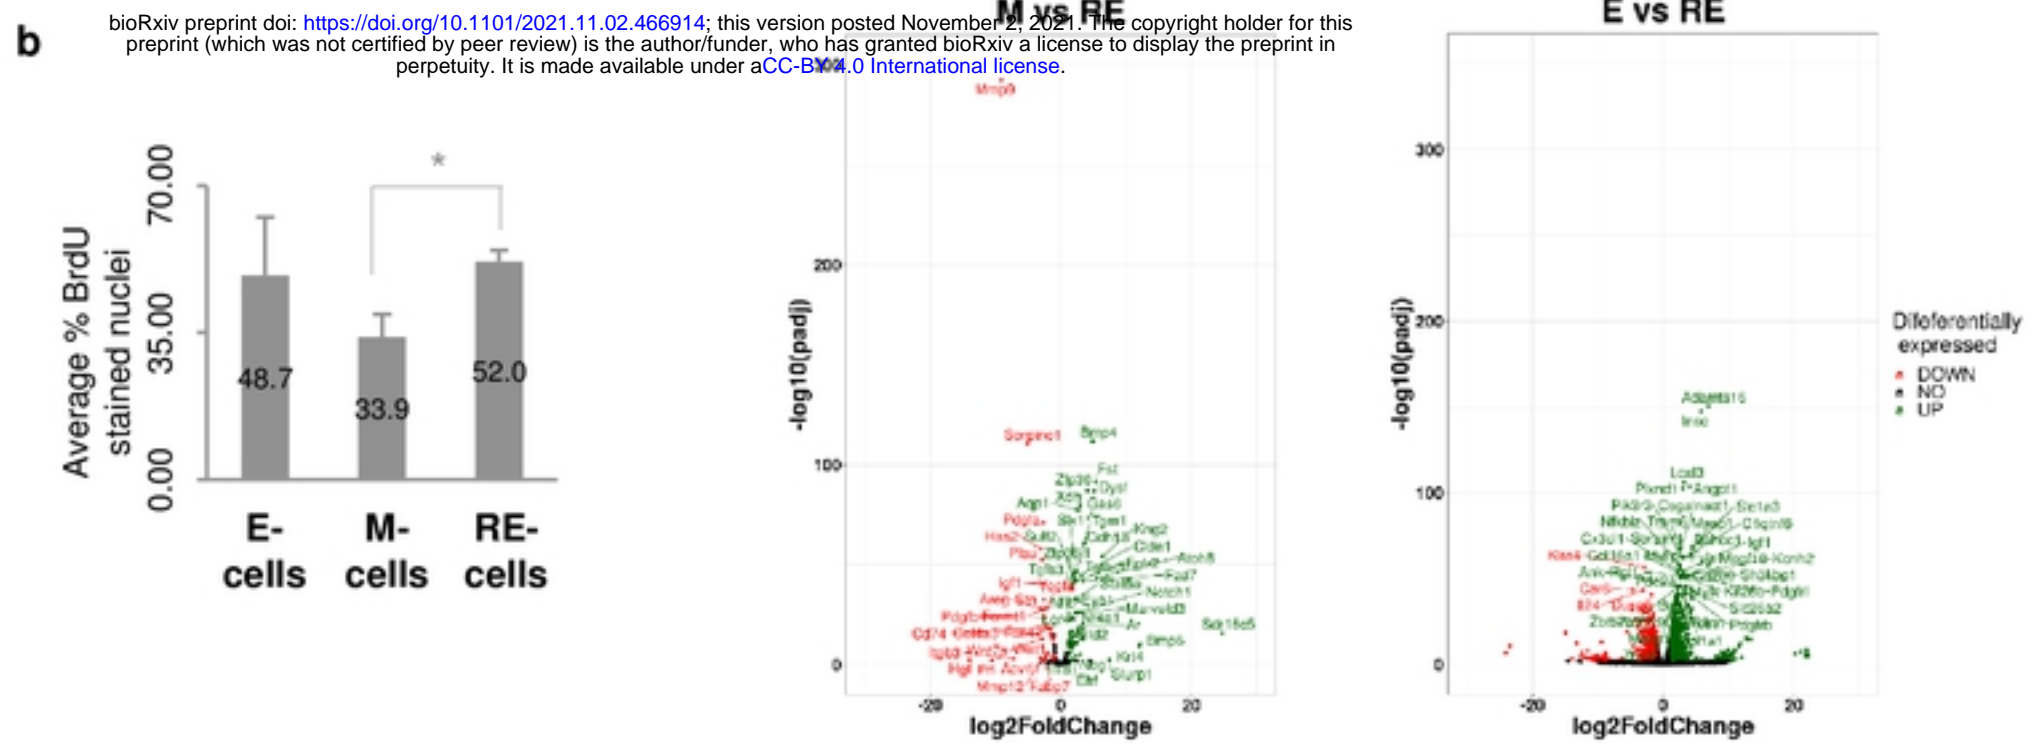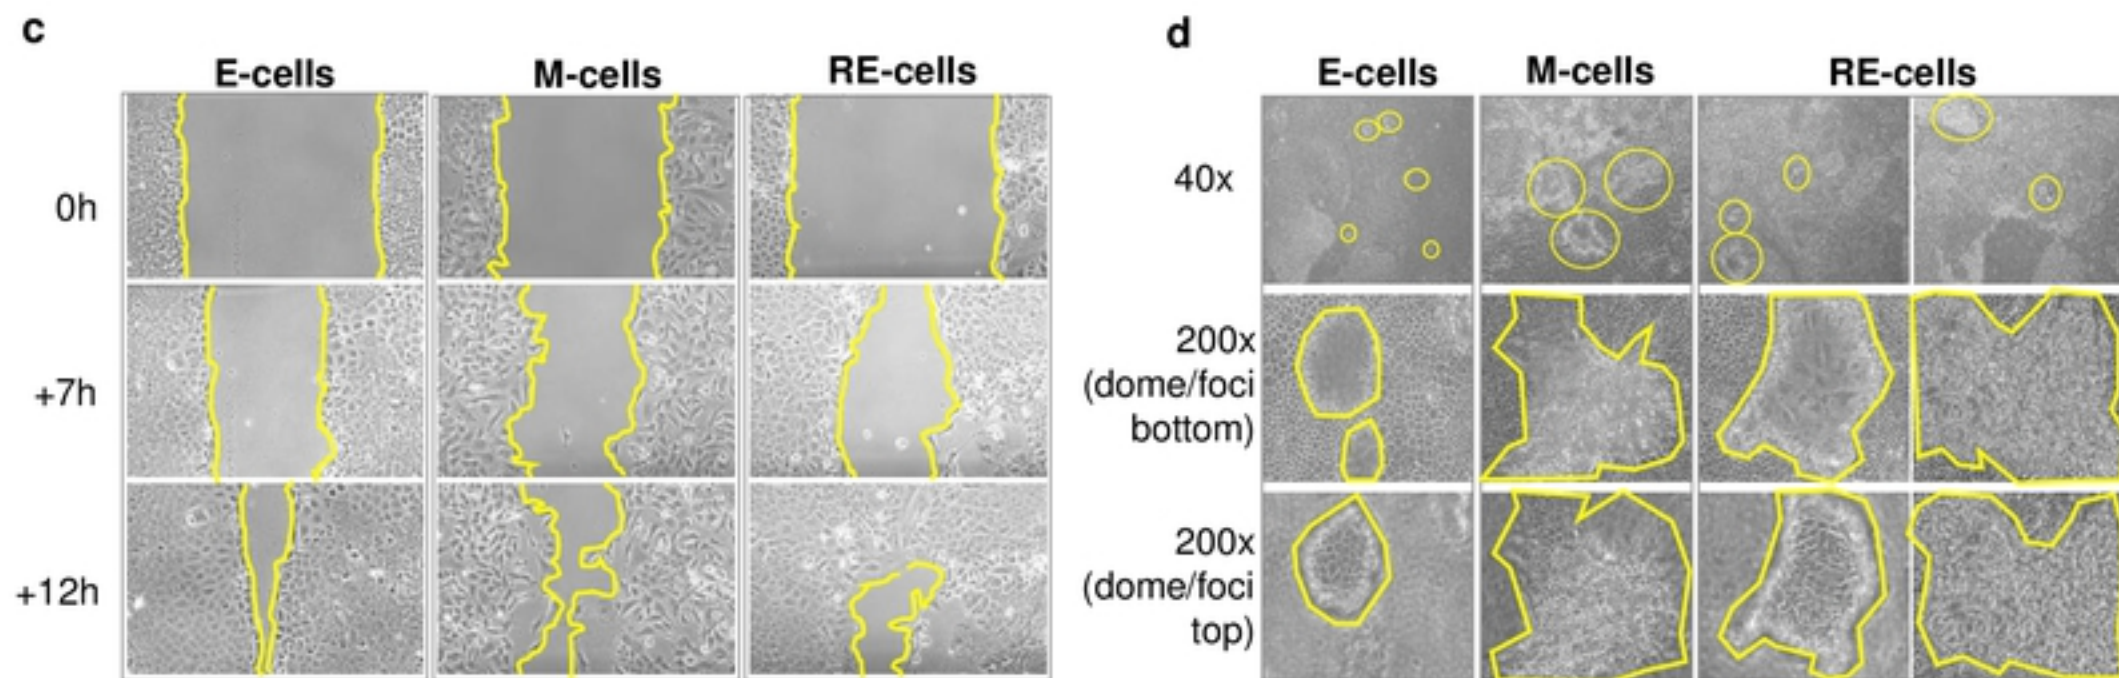

Figure3



**a**

| EpH4 cells           | E-cells                           | M-cells                           | RE-cells                          |
|----------------------|-----------------------------------|-----------------------------------|-----------------------------------|
| Inoculation          | 2x10 <sup>6</sup> cells, (double) | 2x10 <sup>6</sup> cells, (single) | 2x10 <sup>6</sup> cells, (double) |
| n mice               | 4                                 | 4                                 | 5                                 |
| Tumour Incidence     | 100% (4/4 mice)                   | 100% (4/4 mice)                   | 100% (5/5 mice)                   |
| Final Tumour Volumes | 3-25 mm <sup>3</sup>              | 32-343 mm <sup>3</sup>            | 5-304 mm <sup>3</sup>             |

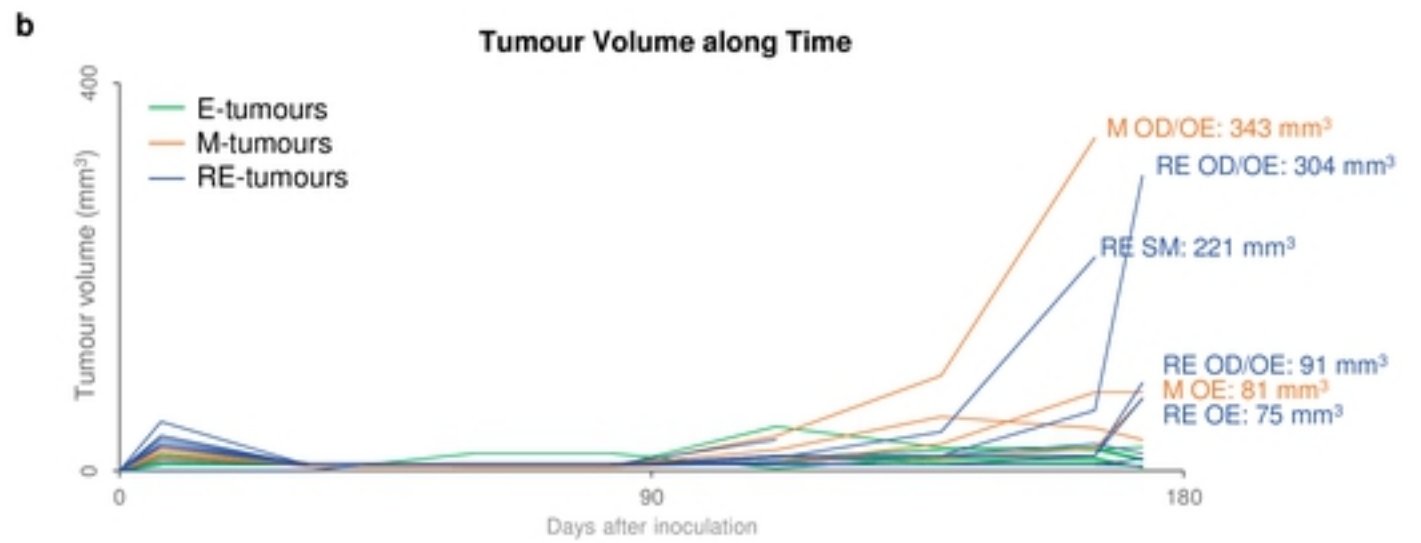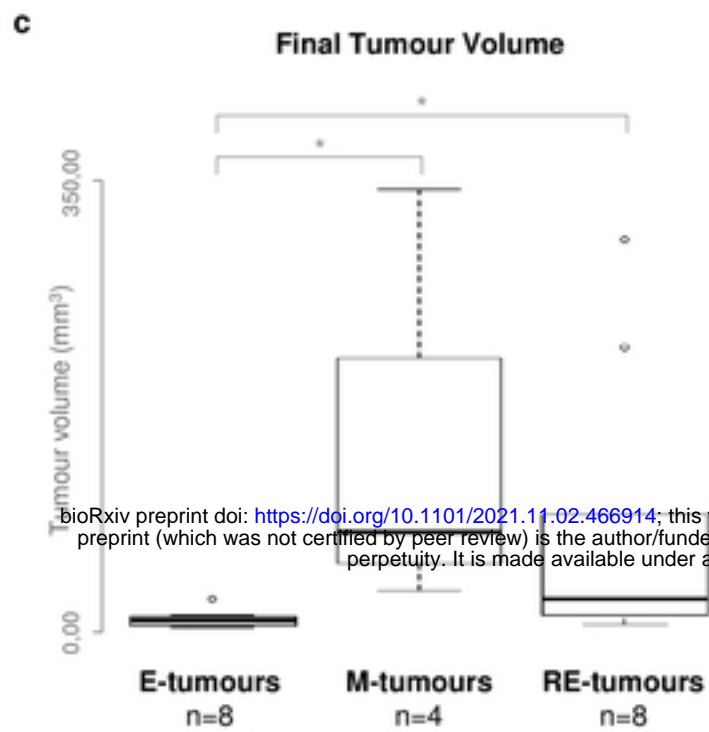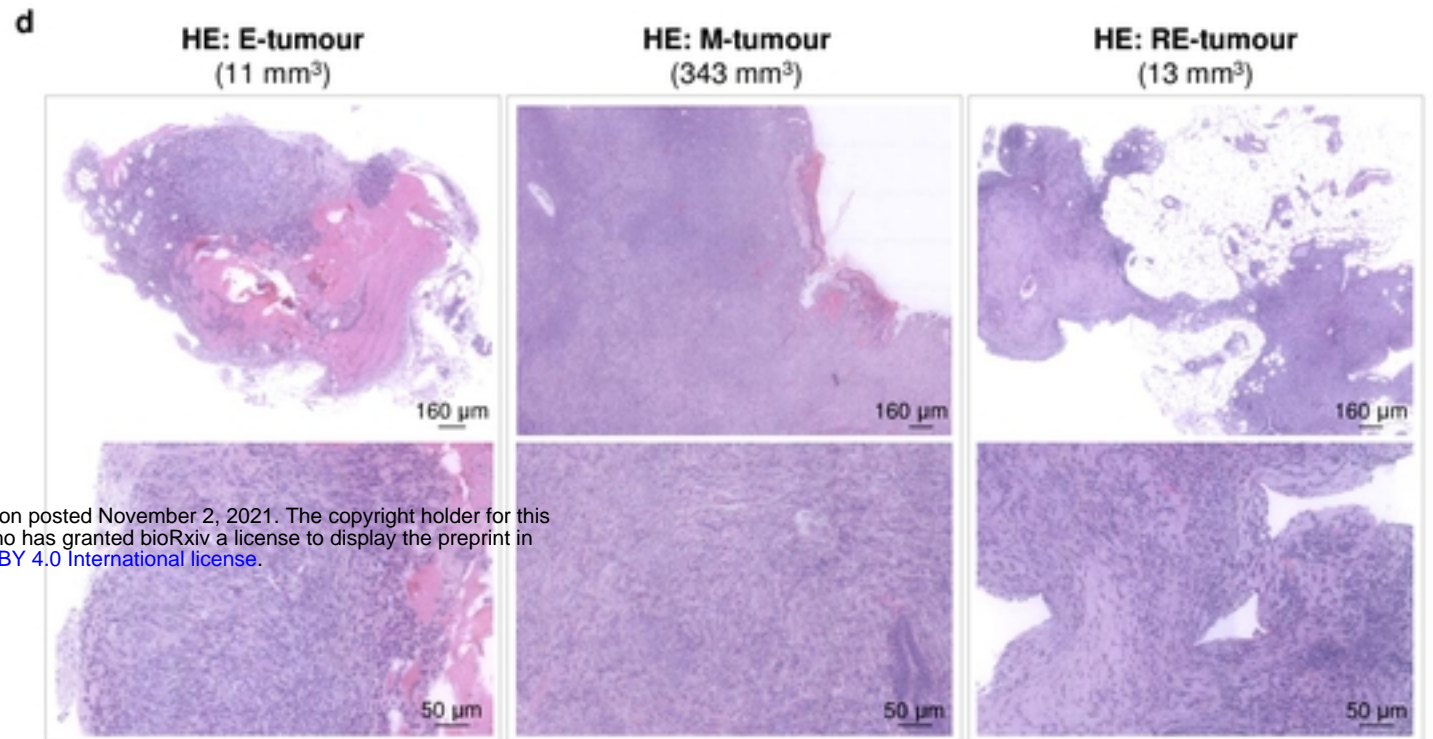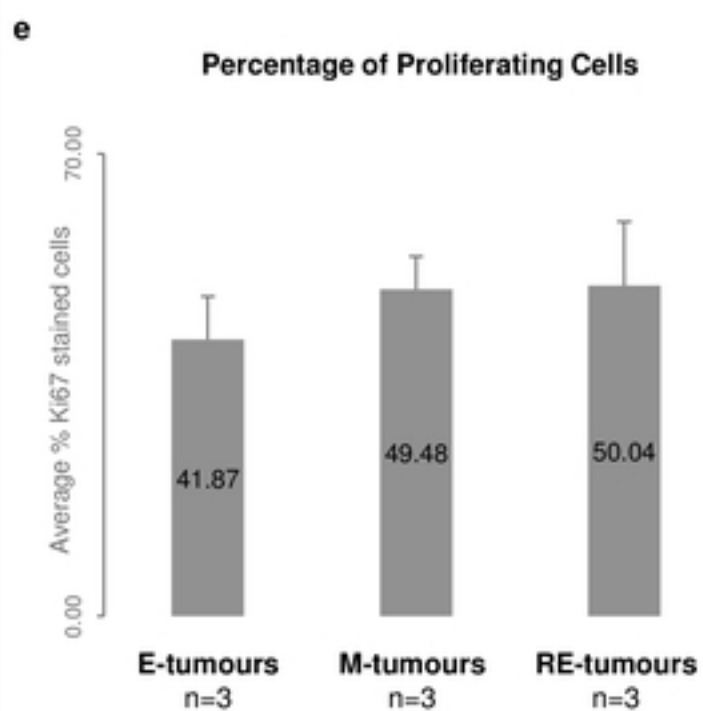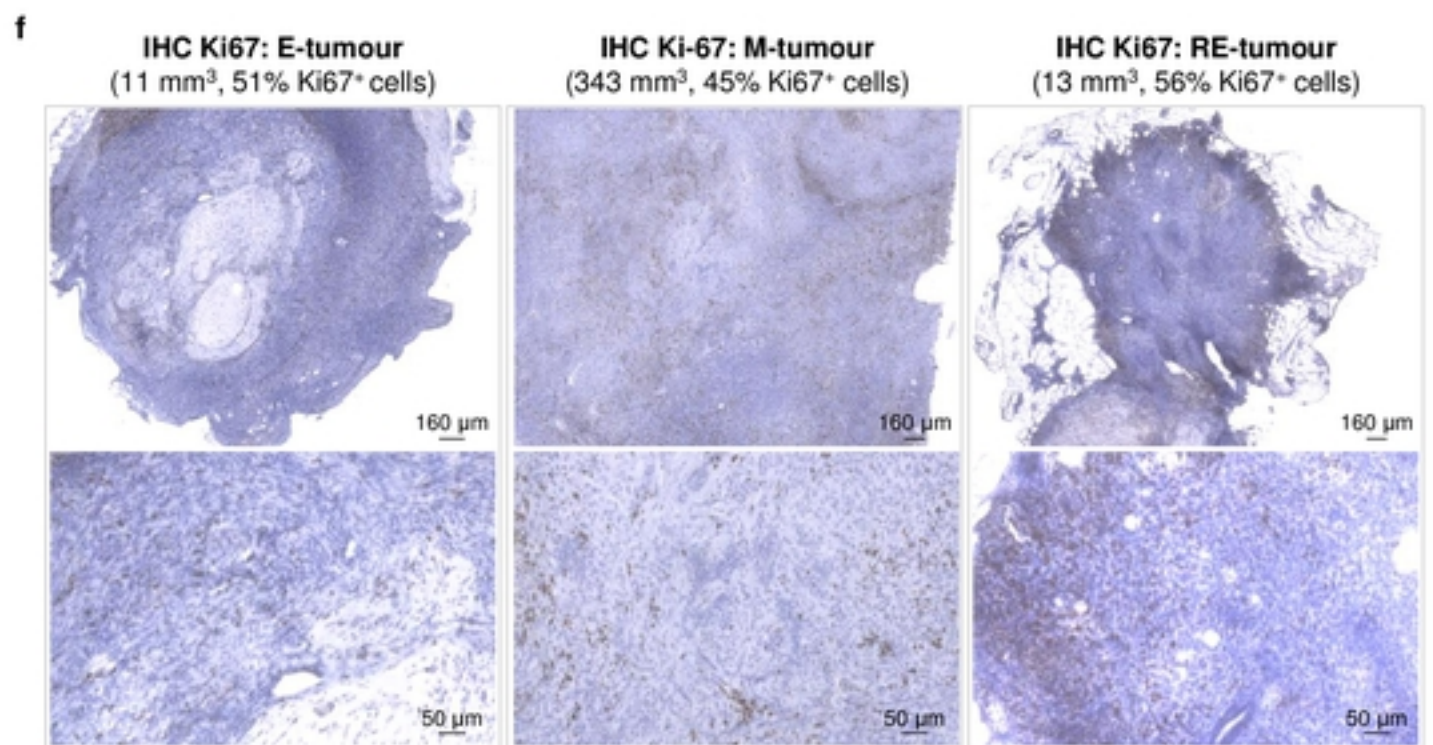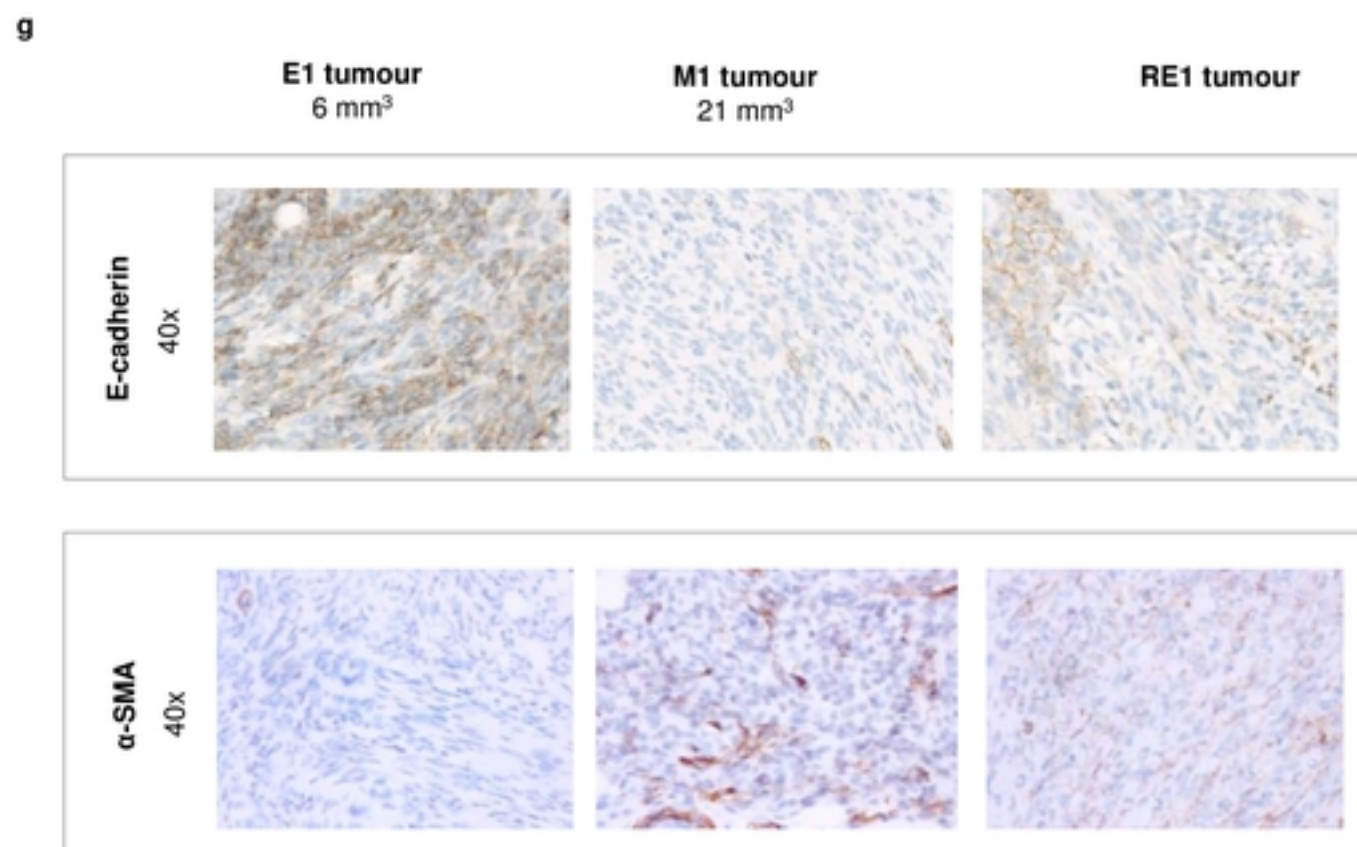

Figure4



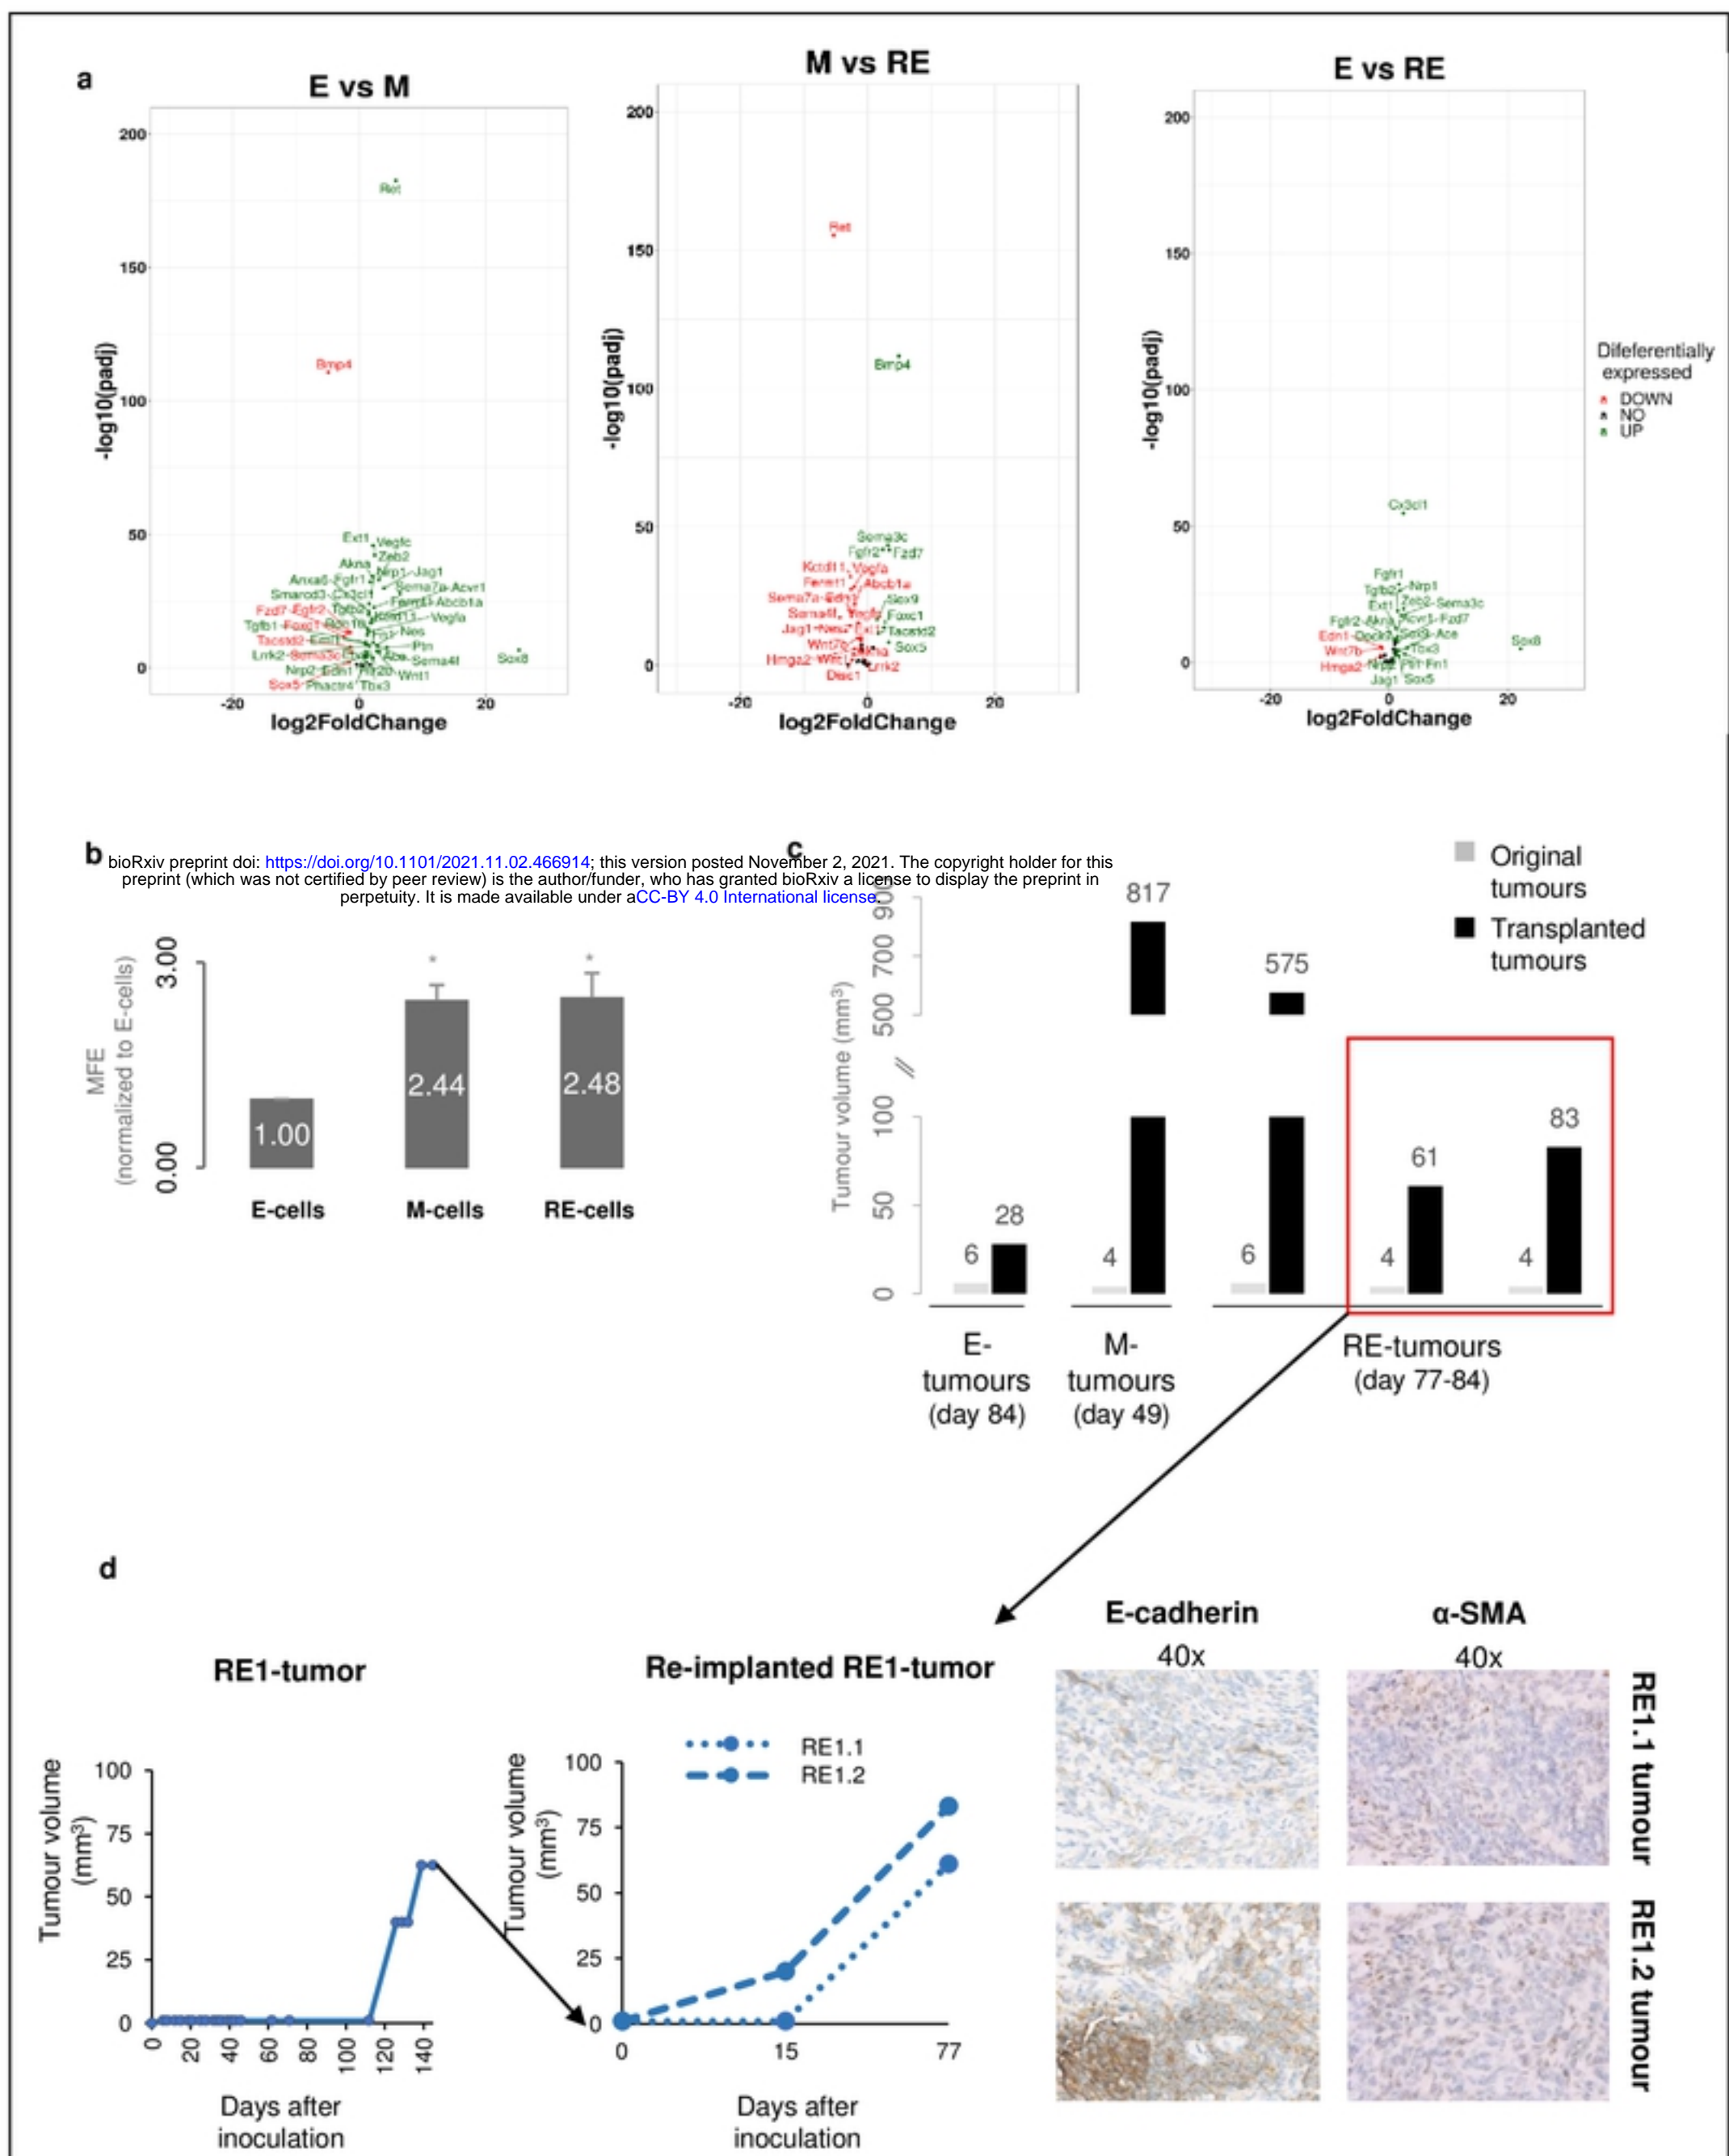

Figure5

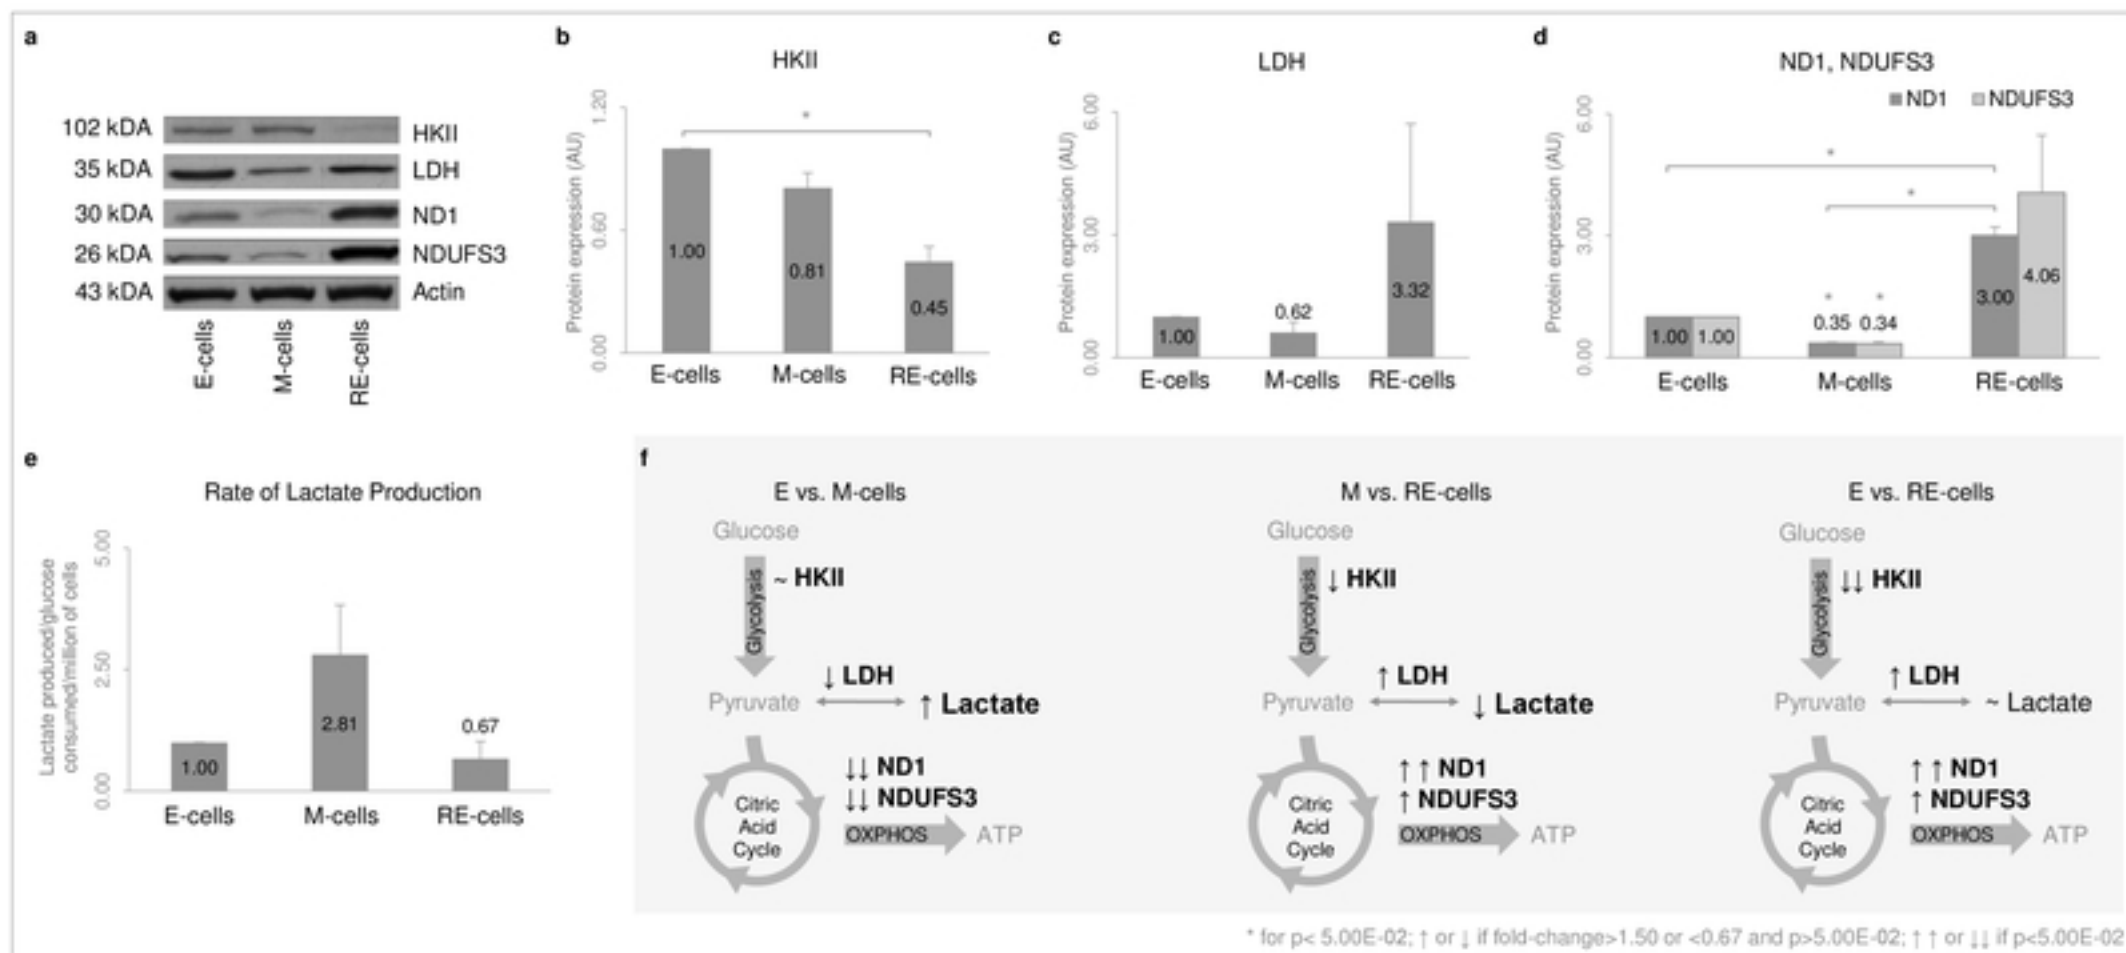

Figure6
